RESEARCH ARTICLE

# BoHV-4-Based Vector Single Heterologous Antigen Delivery Protects STAT1<sup>(-/-)</sup> Mice from Monkeypoxvirus Lethal Challenge

Valentina Franceschi<sup>1</sup>\*, Scott Parker<sup>2</sup>\*, Sarah Jacca<sup>1</sup>\*, Ryan W. Crump<sup>2</sup>, Konstantin Doronin<sup>2</sup>, Edgardo Hembrador<sup>2</sup>, Daniela Pompilio<sup>1</sup>, Giulia Tebaldi<sup>1</sup>, Ryan D. Estep<sup>3</sup>, Scott W. Wong<sup>3</sup>, Mark R. Buller<sup>2</sup>, Gaetano Donofrio<sup>1</sup>\*

**1** Department of Medical-Veterinary Science, University of Parma, Parma, Italy, **2** Molecular Microbiology and Immunology, Saint Louis University School of Medicine, St. Louis, Missouri, United States of America, **3** Vaccine and Gene Therapy Institute, Oregon Health and Science University, Beaverton, Oregon, United States of America

\* These authors contributed equally to this work.

\* [gaetano.donofrio@unipr.it](mailto:gaetano.donofrio@unipr.it)

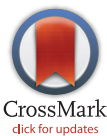

**OPEN ACCESS**

**Citation:** Franceschi V, Parker S, Jacca S, Crump RW, Doronin K, Hembrador E, et al. (2015) BoHV-4-Based Vector Single Heterologous Antigen Delivery Protects STAT1<sup>(-/-)</sup> Mice from Monkeypoxvirus Lethal Challenge. *PLoS Negl Trop Dis* 9(6): e0003850. doi:10.1371/journal.pntd.0003850

**Editor:** David Joseph Diemert, The George Washington University School of Medicine and Health Sciences, UNITED STATES

**Received:** December 30, 2014

**Accepted:** May 27, 2015

**Published:** June 18, 2015

**Copyright:** © 2015 Franceschi et al. This is an open access article distributed under the terms of the [Creative Commons Attribution License](https://creativecommons.org/licenses/by/4.0/), which permits unrestricted use, distribution, and reproduction in any medium, provided the original author and source are credited.

**Data Availability Statement:** All relevant data are within the paper and its Supporting Information files.

**Funding:** The work was supported by Italian Minister of Scientific Research (PRIN 2010-2011; 2010LLXR94\_004) and by National Institutes of Health under Task order A59 of contract HHSN272201000021I. The funders had no role in study design, data collection and analysis, decision to publish, or preparation of the manuscript.

## Abstract

Monkeypox virus (MPXV) is the etiological agent of human (MPX). It is an emerging orthopoxvirus zoonosis in the tropical rain forest of Africa and is endemic in the Congo-basin and sporadic in West Africa; it remains a tropical neglected disease of persons in impoverished rural areas. Interaction of the human population with wildlife increases human infection with MPXV, and infection from human to human is possible. Smallpox vaccination provides good cross-protection against MPX; however, the vaccination campaign ended in Africa in 1980, meaning that a large proportion of the population is currently unprotected against MPXV infection. Disease control hinges on deterring zoonotic exposure to the virus and, barring that, interrupting person-to-person spread. However, there are no FDA-approved therapies against MPX, and current vaccines are limited due to safety concerns. For this reason, new studies on pathogenesis, prophylaxis and therapeutics are still of great interest, not only for the scientific community but also for the governments concerned that MPXV could be used as a bioterror agent. In the present study, a new vaccination strategy approach based on three recombinant bovine herpesvirus 4 (BoHV-4) vectors, each expressing different MPXV glycoproteins, A29L, M1R and B6R were investigated in terms of protection from a lethal MPXV challenge in STAT1 knockout mice. BoHV-4-A-CMV-A29LgD<sub>106</sub>ΔTK, BoHV-4-A-EF1α-M1RgD<sub>106</sub>ΔTK and BoHV-4-A-EF1α-B6RgD<sub>106</sub>ΔTK were successfully constructed by recombineering, and their capacity to express their transgene was demonstrated. A small challenge study was performed, and all three recombinant BoHV-4 appeared safe (no weight-loss or obvious adverse events) following intraperitoneal administration. Further, BoHV-4-A-EF1α-M1RgD<sub>106</sub>ΔTK alone or in combination with BoHV-4-A-CMV-A29LgD<sub>106</sub>ΔTK and BoHV-4-A-EF1α-B6RgD<sub>106</sub>ΔTK, was shown to be able to protect, 100% alone and 80% in combination, STAT1<sup>(-/-)</sup> mice against mortality and morbidity. This work demonstrated the efficacy of BoHV-4 based vectors and the use of BoHV-4 as a vaccine-vector platform.

**Competing Interests:** The authors have declared that no competing interests exist.

## Author Summary

Human Monkeypox is a zoonotic neglected tropical disease, and the majority of human infections occur in the poor rural areas of central Africa. Human Monkeypox was discovered when the Smallpox vaccination campaign stopped, exposing the immunologically unprotected population to the risk of Monkeypoxvirus infection. Currently, no safe and efficacious vaccines for prevention of Monkeypox are available for an epidemic setting, and further studies are needed for the development of a safe and efficacious vaccine. In this study, safety and protection of three recombinant Bovine Herpesvirus 4-based vectors, each delivering a Monkeypox glycoprotein, was evaluated in a suitable mouse model. All three recombinants appeared safe, and one of them, delivering a single dose of Monkeypox M1R glycoprotein, protected 60% of mice against a lethal dose of Monkeypoxvirus; when given as a prime/boost, it afforded 100% protection. Although further investigation into other Monkeypox models, including non-human primate, is needed to assess bovine herpesvirus 4-based vector delivering M1R safety and protection, the findings of this work pave the way for the potential use of Bovine Herpesvirus 4-based vectors for other category A agents.

## Introduction

Monkeypox virus (MPXV) is an orthopoxvirus with a broad-host range capable of infecting many animal species [1]. In humans, MPXV causes a disease very similar to the closely related variola virus, the etiological agent of smallpox: a rash (a 2–4 week period where macules develop and form papules, vesicles and pustules) which is preceded by a 10–14 day incubation, followed by a 1–3 day interval characterized by a prodromal fever, malaise and severe lymphadenopathy of the neck, inguinal and axillary regions [2–4]. The more virulent strains of MPXV (from the Congo Basin region) can induce mortality rates of ~10% [5–8]. The main clinical difference between human MPX and smallpox is the presentation of lymphadenopathy in the former [9,10]. MPXV is endemic to Central and West Africa with increasing numbers of human infections being reported. In 2003, the transmissibility of MPXV became acutely obvious when an outbreak occurred in the United States and MPXV was transmitted to humans from prairie dogs [11,12]. The global vaccination campaign that eradicated smallpox utilized vaccines that are also efficacious against MPXV and was successful because there is no animal reservoir for variola [13]. Indeed, prior to the eradication of smallpox, the existence of MPXV was unknown and it is likely that many cases of human MPX were reported as smallpox. Cases of human MPX are increasing in Africa, this may be due to several factors: 1) increasing interactions between humans and infected animals through environmental degradation; 2) the cessation of routine vaccination against smallpox; 3) an increase in human susceptibility to the virus; 4) an increase in animal-human and human-human transmissibility of the virus; and 5) adaptation of the virus to new host species that co-exist in, or close to, human geographical regions [2,14–18]. The high mortality rate and morbidity rate of MPXV in humans makes it an important emerging disease for study. To date, no antiviral has been FDA-approved for the treatment of human MPX. Vaccines against smallpox have demonstrated good protection against MPXV in animal models and anecdotally in humans [1]; however, most first- and second-generation smallpox vaccines are associated with at least some level of morbidity and a large proportion of the population are contraindicated to vaccination [19]. Third-generation vaccines, such as MVA, have been shown to be safer in non-human primates but require 2

administrations for complete protection [19–22]. Ergo, new and efficacious vaccines to protect against human MPX would be useful.

Using modern genetic engineering techniques, it is possible to isolate, identify, and sequence important genes of pathogenic organisms and place them into new viral vaccine vectors in which they can be faithfully expressed and presented to the immune system with minimal chance of reversion to virulence. In such vaccines, the beneficial properties of both live and killed vaccines can be retained. Viral vectors are not passive delivery systems, but rather active stimulators of the innate and adaptive immunity. Because viral vectors are not all identical, even within the same class of virus, it is difficult to predict from the current knowledge of various potential viral agents which virus will best fulfill the vaccine-vector goals. Consequently, new vaccine-vector agents based on viruses must be explored.

Bovine herpesvirus 4 (BoHV-4) is a gammaherpesvirus not directly associated to a specific disease and establish a persistent infection in the monocyte/macrophage cell lineage of the natural host, the bovine [23]. In contrast to other viruses belonging to the BoHV-4 family, no proof of growth-transformation has been identified and many BoHV-4 genome genes are dispensable and can be potentially deleted to accommodate up to 20–30 kb of foreign DNA [24]. This BoHV-4 characteristic is very important for exploiting BoHV-4 as a vaccine vector.

BoHV-4 have been isolated from other ruminant species such as zebu (*Bos indicus*), American bison (*Bison bison*), African buffalo (*Syncerus caffer*), and sheep. Sporadic isolations were reported in the lion and cat. Experimentally, BoHV-4 was also shown to infect goats, guinea pigs, mice, rats and rabbits. *In vitro*, BoHV-4 is able to replicate in primary cell cultures or cell lines from various animal species such as cattle, sheep, goats, swine, cats, dogs, rabbits, minks, horses, turkeys, ferrets, chickens, hamsters, rats, mice, and monkeys [25–31].

Recombinant BoHV-4s cloned as bacterial artificial chromosome (BAC), expressing immune-dominant antigens from different pathogens, have been shown to successfully immunize mice [32], rats [33], rabbits [29], sheep [27], swine [30] and goats [34]. Moreover, herpes Simplex virus 1 thymidine kinase (HSV-1-TK) gene armed BoHV-4-based vector displayed enhanced oncolytic properties in immune-competent orthotopic syngenic mouse and rats glioma models [31]. We have used the 129 STAT1<sup>-/-</sup> mouse model to evaluate the capability of BoHV-4-based vectors expressing MPXV antigens to elicit a protective immune response against a lethal MPXV challenge [35] [35]. The capacity of the BoHV-4-based vectors to elicit a protective immune response was compared to a smallpox vaccine (MVA) known to induce little to no morbidity [36]. Thus, we have established a starting point for BoHV-4-based vector applications toward MPX and other important human diseases.

## Materials and Methods

### Cell lines

African green Monkey kidney [(VERO), ATCC: CCL-81], bovine embryo kidney [(BEK) from Dr. M. Ferrari, Istituto Zooprofilattico Sperimentale, Brescia, Italy; (BS CL-94)], BEK expressing cre recombinase (BEK<sup>cre</sup>) [28] and Human Embryo Kidney 293T [(HEK 293T) ATCC: CRL-11268] cell lines were cultured in complete growth medium [Eagle's minimal essential medium (EMEM, Lonza) containing 10% fetal bovine serum (FBS), 2 mM of l-glutamine (SIGMA), 100 IU/mL of penicillin (SIGMA), 100 µg/mL of streptomycin (SIGMA) and 2.5 µg/mL of Amphotericin B (SIGMA)] and incubated at 37°C, 5% CO<sub>2</sub>. *Cercopithecus aethiops* epithelial kidney cells [BS-C-1, (ATCC CCL 26)] were grown in DMEM (Lonza, Basel, Switzerland) containing 10% fetal calf serum (FCS) (Hyclone III, Logan, UT), 2 mM L-glutamine (GIBCO, Grand Island, NY), 100 U/ml penicillin (GIBCO, Grand Island, NY), and 100 µg/ml streptomycin (GIBCO, Grand Island, NY).

## Constructs generation

The A29L, M1R and B6R ORFs, were amplified from Monkeypox DNA (strain V79-I-005; Accession: HQ857562.1) using primer pairs listed in [Table 1](#). The sense primer contains at its 5'-end the *NheI* restriction site along with the Kozak's sequence preceding the ATG, for a better translation initiation, whereas the antisense primer contains at its 5'-end a *SalI* restriction site for the in-frame cloning of the ORF with a gD106 tag peptide present in pCMV-IgK-VP2-gD<sub>106</sub> plasmid vector. pCMV-IgK-VP2-gD<sub>106</sub> has the human cytomegalovirus Immediate Early gene (CMV) promoter, the Immunoglobulin kappa light chain leader sequence (IgK), the Bluetongue virus VP2 ORF, the gD<sub>106</sub> epitope of Bovine herpesvirus 1 glycoprotein D, successfully used as a tag during the cloning, and the bovine growth hormone polyadenylation site [37].

The 3 ORFs were cut with *NheI/SalI* and cloned into pCMV-IgK-VP2-gD<sub>106</sub> cut with the same enzymes. This strategy allowed the substitution of the IgK-VP2 sequence with those of the 3 ORFs to generate pCMV-A29LgD<sub>106</sub>, pCMV-M1RgD<sub>106</sub> and pCMV-B6RgD<sub>106</sub>.

To generate pTK-CMV-A29LgD<sub>106</sub>-TK, pCMV-A29LgD<sub>106</sub> was cut with *BamHI*, treated with T4 DNA polymerase for blunt ending and cut with *NheI*; A29LgD<sub>106</sub> (442 bp) was excised from the pCMV-A29LgD<sub>106</sub> and inserted into the shuttle vector pINT2EGFP [25] cut with *NheI/SmaI* to replace GFP ORF with the chimeric protein. pINT2EGFP contains two BoHV-4 Thymidine kinase gene homology regions flanking the Green Fluorescent Protein (GFP) expression cassette driven by the CMV promoter, cutting with *NheI/SmaI* the GFP ORF was replaced with that of A29LgD<sub>106</sub>.

To generate pEF1 $\alpha$ -M1RgD<sub>106</sub> and pEF1 $\alpha$ -B6RgD<sub>106</sub>, the CMV promoter of pCMV-M1RgD<sub>106</sub> and pCMV-B6RgD<sub>106</sub> was substituted with that of the human elongation factor 1 alpha (EF1 $\alpha$ ). EF1 $\alpha$  was amplified by PCR from pWPI plasmid vector (Addgene plasmid #12254). pWPI was first linearized with *PmeI*, then the PCR reaction was carried out with 0.25  $\mu$ M of a couple of primers (EF1 $\alpha$ -NdeI-sense and EF1 $\alpha$ -NheI-antisense; [Table 1](#)) in a final volume of 50  $\mu$ L containing 10 mM Tris—hydrochloride pH 8.3, 0.2 mM deoxynucleotide triphosphates, 3 mM MgCl<sub>2</sub>, 50 mM KCl and 5% DMSO. Each cycle of 35, consisted of denaturation at 94°C for 1 min, primer annealing at 50°C for 1 min and elongation for 90 sec with 1U of Pfu DNA polymerase at 72°C. The 1237 bp EF1 $\alpha$  amplification product was checked in 1% agarose gel and visualized after ethidium bromide staining in 1 $\times$  TAE buffer (40 mM Tris-acetate, 1 mM EDTA).

pTK-EF1 $\alpha$ -M1RgD<sub>106</sub>-TK and pTK-EF1 $\alpha$ -B6RgD<sub>106</sub>-TK constructs were obtained by sub-cloning EF1 $\alpha$ -M1RgD<sub>106</sub> and EF1 $\alpha$ -B6RgD<sub>106</sub> expression cassettes, cut with *NdeI/MluI* and blunted-end with T4 DNA polymerase, from pEF1 $\alpha$ /M1RgD<sub>106</sub> and EF1 $\alpha$ /B6RgD<sub>106</sub> respectively in *SmaI* cut pINT2 [38]. All enzymes were purchased from Thermo Scientific.

## Transient transfection

Confluent HEK293T cells were seeded into 6 well plates (3 $\times$ 10<sup>5</sup> cells/well) and incubated at 37°C with 5% CO<sub>2</sub>; when the cells were sub-confluent the culture medium was removed and the cells were transfected with pTK-CMV-A29LgD<sub>106</sub>-TK, pTK-EF1 $\alpha$ -M1RgD<sub>106</sub>-TK or pTK-EF1 $\alpha$ -B6RgD<sub>106</sub>-TK using Polyethylenimine (PEI) transfection reagent (Polysciences, Inc.). Briefly, 3  $\mu$ g of DNA were mixed with 7.5  $\mu$ g PEI (1mg/mL) (ratio 1:2.5 DNA- Pei) in 200  $\mu$ L of Dulbecco's modified essential medium (DMEM) at high glucose percentage (Euroclone) without serum. After 15 min at RT, 800  $\mu$ L of medium without serum was added and the transfection solution was transferred to the well and left on the cells for 6 h at 37°C with 5% CO<sub>2</sub> in air, in a humidified incubator. The transfection mixture was then replaced

**Table 1. List of primers used in that work.**

| Primer name                  | 5'-3' sequence                                | amplicon |
|------------------------------|-----------------------------------------------|----------|
| A29L sense                   | 5'- ACCGCTAGCCACCATGGACGGAACCTTTTCCC-3' NheI  | 353 bp   |
| A29L antisense               | 5'-GTAGTCGACCTCATATGGACGCCGTCCAG-3' Sall      |          |
| M1R sense                    | 5'- ACCGCTAGCCACCATGGGTGCCGAGCAAGCAT-3' NheI  | 773 bp   |
| M1R antisense                | 5'-GTAGTCGACGTTTTGTATATCCGTGGTAG-3' Sall      |          |
| B6R sense                    | 5'- ACCGCTAGCCACCATGAAAACGATTTCCGTTGT-3' NheI | 977 bp   |
| B6R antisense                | 5'-GTAGTCGACCGGTAGCAATTTATGGAAC-3' Sall       |          |
| EF1 $\alpha$ -NdeI-sense     | 5'-CCCATATGCTTGAAGGAGTGGGAATTGG-3' NdeI       | 1237 bp  |
| EF1 $\alpha$ -NheI-antisense | 5'-CCCGCTAGCTAAATTTAAATGTCGAAATCC-3' NheI     |          |

doi:10.1371/journal.pntd.0003850.t001

with fresh medium (EMEM, with 10% FBS, 50 IU/ml of penicillin, 50  $\mu$ g/ml of streptomycin and 2.5  $\mu$ g/ml of Amphotericin B) and incubated for 24 h at 37°C with 5% CO<sub>2</sub>.

### Viruses and viral replication

BoHV-4-A, BoHV-4-A-CMV-A29LgD<sub>106</sub> $\Delta$ TK, BoHV-4-A-EF1 $\alpha$ -M1RgD<sub>106</sub> $\Delta$ TK and BoHV-4-A-EF1 $\alpha$ -B6RgD<sub>106</sub> $\Delta$ TK were propagated by infecting confluent monolayers of BEK and VERO cells at a multiplicity of infection (MOI) of 0.5 50% tissue culture infectious doses (TCID<sub>50</sub>) per cell and maintained in medium with only 2% FBS for 2 h. The medium was then removed and replaced with fresh EMEM containing 10% FBS. When the cytopathic effect (CPE) occurred in the majority of the cell monolayer (~72 h post infection), the virus was prepared by freezing and thawing cells three times and pelleting the virions through a 30% sucrose cushion, as described previously [39]. Virus pellets were then resuspended in cold EMEM without FBS. TCID<sub>50</sub> were determined with BEK cells by limiting dilution. A plaque-purified isolate of the MPXV strain ZAI-79 [40] was purified through a sucrose cushion [41] and propagated in BS-C-1 cells [42]. Virus infectivity was estimated as described previously [43]. Briefly, virus suspensions were serially diluted in PBS +1% FCS (Fetal Clone II, HyClone), absorbed to monolayers for 1 hour at 37°C, and overlaid with a suspension of 1% carboxyl methyl cellulose in DMEM +5% FCS. After 2 days at 37°C, virus plaques were visualized and virus inactivated by the addition to each well of a 0.3% crystal violet/10% formalin solution.

### Western immunoblotting

Protein cell extracts were obtained from a 6-well confluent plate of HEK293T transfected with pINT2/CMVA29LgD<sub>106</sub>, pINT2/EF1 $\alpha$ M1RgD<sub>106</sub> or pINT2/EF1 $\alpha$ B6RgD<sub>106</sub> and from 25-cm<sup>2</sup> confluent flasks of BEK cells or VERO cells infected with BoHV-4-A-CMV-A29LgD<sub>106</sub> $\Delta$ TK, BoHV-4-A-EF1 $\alpha$ -M1RgD<sub>106</sub> $\Delta$ TK and BoHV-4-A-EF1 $\alpha$ -B6RgD<sub>106</sub> $\Delta$ TK by adding 100  $\mu$ L of cell extraction buffer (50 mM Tris—HCl, 150 mM NaCl, and 1% NP-40; pH 8). A 10% SDS—PAGE gel electrophoresis was used to analyze cell extracts containing 50  $\mu$ g of total protein, after protein transfer in nylon membranes by electroblotting, the membranes were incubated with bovine anti gD<sub>106</sub> monoclonal antibody (clone 1B8-F11; VRMD, Inc., Pullman, WA) antibody, probed with horseradish peroxidase-labelled anti-mouse immunoglobulin antibody (Sigma) and visualized by enhanced chemiluminescence (ECL Kit; Pierce).

### BAC recombineering and selection

Recombineering was performed as previously described [44] with some modifications. Five hundred microliters of a 32°C overnight culture of SW102 containing BAC-BoHV-4-A-Kana-

GalKΔTK, were diluted in 25 ml Luria—Bertani (LB) medium with or without chloramphenicol (SIGMA) selection (12.5 mg/ml) in a 50 ml baffled conical flask and grown at 32°C in a shaking water bath to an OD<sub>600</sub> of 0.6. Then, 10 ml were transferred to another baffled 50 mL conical flask and heat-shocked at 42°C for exactly 15 min in a shaking water bath. The remaining culture was left at 32°C as the uninduced control. After 15 min the two samples, induced and uninduced, were briefly cooled in ice/water bath slurry and then transferred to two 15mL Falcon tubes and pelleted using 5000 r.p.m. (Eppendorf centrifuge) at 0°C for 5 min. The supernatant was poured off and the pellet was resuspended in 1mL ice-cold ddH<sub>2</sub>O by gently swirling the tubes in ice/water bath slurry. Subsequently, 9 ml ice-cold ddH<sub>2</sub>O were added and the samples pelleted again. This step was repeated once more, the supernatant was removed and the pellet (50 μL each) was kept on ice until electroporated with gel-purified fragments (~3.3, ~4.4 and ~4.6 kb respectively for TK-CMV-A29LgD<sub>106</sub>-TK, TK-EF1α-M1RgD<sub>106</sub>-TK and TK-EF1α-B6RgD<sub>106</sub>-TK) obtained by cutting pTK-CMV-A29LgD<sub>106</sub>-TK, pTK-EF1α-M1RgD<sub>106</sub>-TK and pTK-EF1α-B6RgD<sub>106</sub>-TK with *Cla*I/*Pvu*II (Thermo Scientific). An aliquot of 25 μl (~200 ng) was used for each electroporation in a 0.1 cm cuvette at 25 μF, 2.5 kV and 201Ω. After electroporation, for the counter selection step, the bacteria were recovered in 10 mL LB in a 50 mL baffled conical flask and incubated for 4.5h in a 32°C shaking water bath. Bacteria serial dilutions were plated on M63 minimal medium plates containing 15 g/L agar, 0.2% glycerol, 1mg/L D-biotin, 45 mg/L L-leucine, 0.2% 2-deoxy-galactose and 12.5 mg/mL chloramphenicol. All the complements for M63 medium were purchased from SIGMA.

Plates were incubated 3–5 days at 32°C; then several selected colonies were picked up, streaked on McConkey agar indicator plates (DIFCO, BD Biosciences) containing 12.5 g/mL of chloramphenicol and incubated at 32°C for 3 days until white colonies appeared. White colonies were grown in duplicate for 5–8h in 1mL of LB containing 50 mg/mL of kanamycin (SIGMA) or LB containing 12.5 mg/mL of chloramphenicol. Only those colonies that were kanamycin negative and chloramphenicol positive were kept and grown overnight in 5mL of LB containing 12.5 mg/mL of chloramphenicol. BAC DNA was purified and analyzed through *Hind*III restriction enzyme digestion for TK-CMV-A29LgD<sub>106</sub>-TK, TK-EF1α-M1RgD<sub>106</sub>-TK and TK-EF1α-B6RgD<sub>106</sub>-TK fragment targeted integration, was separated by electrophoresis overnight in a 1% agarose gel, stained with ethidium bromide, capillary transferred to a positively charged nylon membrane (Roche), and cross-linked by UV irradiation by standard procedures [28]. Hybridization with digoxigenin-labeled probes confirmed the identity of specific restriction fragments.

The 353, 573, 977 bp amplicons for A29L, M1R and B6R probes were generated by PCR with the primers: A29L sense/antisense, M1R sense/antisense, and B6R sense/antisense listed in Table 1, as previously described [29]. Original detailed protocols for recombineering can also be found at the recombineering website (<http://recombineering.ncifcrf.gov>).

## Cell culture electroporation and recombinant virus reconstitution

BEK or BEKcre cells were maintained as a monolayer with complete DMEM growth medium with 10% FBS, 2 mM L-glutamine, 100 IU/mL penicillin and 10 mg/mL streptomycin. When cells were sub-confluent (70–90%) they were split to a fresh culture vessel (i.e., every 3–5 days) and were incubated at 37°C in a humidified atmosphere of 95% air–5% CO<sub>2</sub>. BAC DNA (5 μg) was electroporated in 600 μl DMEM without serum (Equibio apparatus, 270 V, 960 mF, 4-mm gap cuvettes) into BEK and BEKcre cells from a confluent 25-cm<sup>2</sup> flask. Electroporated cells were returned to the flask, after 24h the medium was replaced with fresh medium, and cells were split 1:2 when they reached confluence at 2 days post-electroporation. Cells were left to grow until the appearance of CPE. Recombinant viruses were propagated by infecting

confluent monolayers of BEK cells at a M.O.I. of 0.1–0.5 TCID<sub>50</sub> per cell and maintaining them in MEM with 10% FBS for 2 h.

### Viral growth curves

BEK cells were infected with BoHV-4-A, BoHV-4-A-CMV-A29LgD<sub>106</sub>ΔTK, BoHV-4-A-EF1α-M1RgD<sub>106</sub>ΔTK and BoHV-4-A-EF1α-B6RgD<sub>106</sub>ΔTK at a M.O.I. of 0.1 TCID<sub>50</sub>/cell and incubated at 37°C for 4 h. Infected cells were washed with serum-free EMEM and then overlaid with EMEM containing 10% FBS, 2 mM Lglutamine, 100 IU/mL penicillin, 100 mg/mL streptomycin and 2.5-mg/mL Amphotericin B. The supernatants of infected cultures were harvested after 24, 48, 72 and 96 h, and the amount of infectious virus was determined by limiting dilution on BEK cells by the TCID<sub>50</sub> method.

### Animals

Eight-week old female 129 *stat1*<sup>-/-</sup> mice were bred in-house and housed in filter-top microisolator cages and fed commercial mouse chow and water *ad libitum*. The randomized mice were housed in an animal biosafety level 3 containment area, with 5 mice/group. Animal husbandry and experimental procedures were approved by the Institutional Animal Care and Use Committee. Mice were monitored every day until the termination of the experiment.

### Ethics statement

Animal Use Protocol 2082 entitled “Pathogenesis of orthopoxviruses and efficacy testing of orthopoxvirus vaccines and antivirals ” was approved by the Saint Louis University Institutional Animal Care and Use Committee (IACUC) on 5/24/2012. Saint Louis University is a USDA registered research facility (43-R-011), is regularly inspected and files all required documentation, including an annual report. In addition, under the provisions of the Public Health Service Policy on the Humane Care and Use of Laboratory Animals, the University files required assurance documents to the Office of Laboratory Animal Welfare (OLAW). (OLAW Assurance Number A-3225-01, effective from March 4, 2013 through March 31, 2017). The Animal Care and Use Program at Saint Louis University are fully accredited by the Association for Assessment and Accreditation of Laboratory Animal Care, International (AAALACI), continuing accreditation notification July 18, 2012.

### Vaccines and vectors

BoHV-4s vectors were injected intraperitoneally (IP) in a total volume of 300 μl with DMEM used as a vehicle. For vaccinations with one vector, injections were comprised of 100 μl of vector + 200 μl of vehicle. For the combination injections, 100 μl of each vector was included for a total of 300 μl. Injections were given as a primary vaccination at T = 0 days and as a booster vaccination at T = 23 days (see [Table 2](#)). Each vector was injected at a Modified Vaccinia Ankara (MVA) (a gift from the NIAID-NIH, Bethesda, MD) was provided at a dose of 2x10<sup>8</sup> plaques forming units (PFU)/ml and was injected in 0.1 ml between the skin and underlying layers of tissue in the scapular region on the backs of mice.

### MPXV challenge

Mice were anesthetized with 0.1 ml/10 g body weight of ketamine HCl (6 mg/ml) and xylazine (0.5 mg/ml) by intraperitoneal injections. Anesthetized mice were laid on their dorsal side with their bodies angled so that the anterior end was raised 45° from the surface; a plastic mouse holder was used to ensure conformity [45]. MPXV was diluted in PBS without Ca<sup>2+</sup> and Mg<sup>2+</sup>

**Table 2. Study design and mortality of mice challenged via the IN route with 2x10<sup>5</sup> PFU of MPXV.**

| Group | Cage | No. of Mice    | Vaccine (T = 0) <sup>a</sup> | Booster (T = 23) <sup>b</sup> | MPXV Challenge (T = 50) <sup>c</sup> | Day of Death (RTC) <sup>d</sup> | MTD ±SEM <sup>d</sup> | Mortality (%) |
|-------|------|----------------|------------------------------|-------------------------------|--------------------------------------|---------------------------------|-----------------------|---------------|
| 1     | 1    | 5              | N/T                          | N/T                           | PBS                                  |                                 |                       |               |
| 2     | 2    | 5              | N/T                          | N/T                           | +                                    | 7,8,8,9,9                       | 8.2±0.4               | 100           |
| 3     | 3    | 5              | Veh                          | Veh                           | +                                    | 7,9,9,9,17                      | 10.2±1.7              | 100           |
| 4     | 4    | 5              | MVA                          | Veh                           |                                      |                                 |                       |               |
|       | 5    | 5              | MVA                          | MVA                           | +                                    |                                 |                       |               |
| 5     | 6    | 5              | A29L                         | Veh                           |                                      | 8,9,9,9                         | 8.8±0.3               | 80            |
|       | 7    | 41             | A29L                         | A29L                          | +                                    | 7,10,10,                        | 9.0±1.0               | 75            |
| 6     | 8    | 5              | M1R                          | Veh                           |                                      | 7,8                             | 7.5±0.5               | 40            |
|       | 9    | 5              | M1R                          | M1R                           | +                                    |                                 |                       |               |
| 7     | 10   | 5              | B6R                          | Veh                           |                                      | 6,8,9                           | 7.7±0.9               | 60            |
|       | 11   | 4 <sup>e</sup> | B6R                          | B6R                           | +                                    | 7,8                             | 7.5±0.5               | 50            |
| 8     | 12   | 5              | Combo                        | Veh                           |                                      | 7,8                             | 7.5±0.5               | 40            |
|       | 13   | 5              | Combo                        | Combo                         | +                                    | 9                               | 9.0                   | 20            |

<sup>a</sup>BoHV-4 vaccines were administered at T = 0 days via the IP route in a total volume of 0.3 ml at 1x10<sup>7</sup> PFU. MVA was administered at a dose of 2x10<sup>7</sup> PFU in a total volume of 0.1 ml injected IM. Veh indicates a DMEM vehicle.

<sup>b</sup>Booster vaccinations were administered as for <sup>a</sup>.

<sup>c</sup>Mice were challenged via the IN route with 2x10<sup>5</sup> PFU of MPXV. Virus was introduced in a total volume of 25 #x03BC;l to one nare.

<sup>d</sup>RTC, relative to challenge; MTD, mean time to death; SEM, standard error of the mean.

<sup>e</sup>One mouse was removed due to mortality during blood collection.

doi:10.1371/journal.pntd.0003850.t002

to the required concentration and slowly loaded into each nare (5 #x03BC;l/nare). Mice were subsequently left in situ for 2–3 minutes before being returned to their cages.

## Statistics

Paired T-tests (tailed) were used to compare means between groups of mice. Mortality rates were compared using the Fisher’s exact test. Blinded lesion pictures were measured qualitatively using a scoring system ranging 0–4 in severity. P values <0.05 were considered statistically significant.

## Results

### Design and expression of monkeypox virus tagged peptides

Among the approximately 200 genes that comprise the Monkeypox virus genome, only few genes encoding antigenic proteins—that are known—are able to elicit a neutralizing antibody response in vaccinated animals. Among these antigens, A29L, M1R and B6R orthologs were selected as candidate antigens to be delivered by BoHV-4 based-vector. A29L, M1R and B6R ORFs were amplified by PCR from a Cosmid library and sub-cloned in frame with a tag peptide, gD106 [46] (Fig 1A, 1E and 1H), which was contained in a mammalian expression vector plasmid construct. M1R and B6RgD<sub>106</sub> tagged ORFs were placed under the transcriptional control of the EF1α promoter (Fig 1F and 1I), whereas A29LgD<sub>106</sub> tagged ORF under the transcriptional control of the CMV promoter (Fig 1B). So generated expression cassettes (CMV-A29LgD<sub>106</sub>, EF1α-M1RgD<sub>106</sub> and EF1α-B6RgD<sub>106</sub>) were validated, in terms of protein expression, by transient transfection in 293T cells and Western-immunoblotting with a monoclonal antibody directed against the gD<sub>106</sub> tag peptide. A29L, M1R and B6RgD<sub>106</sub> tagged antigens were all well expressed in the whole cell extracts of the transiently transfected cells (Fig



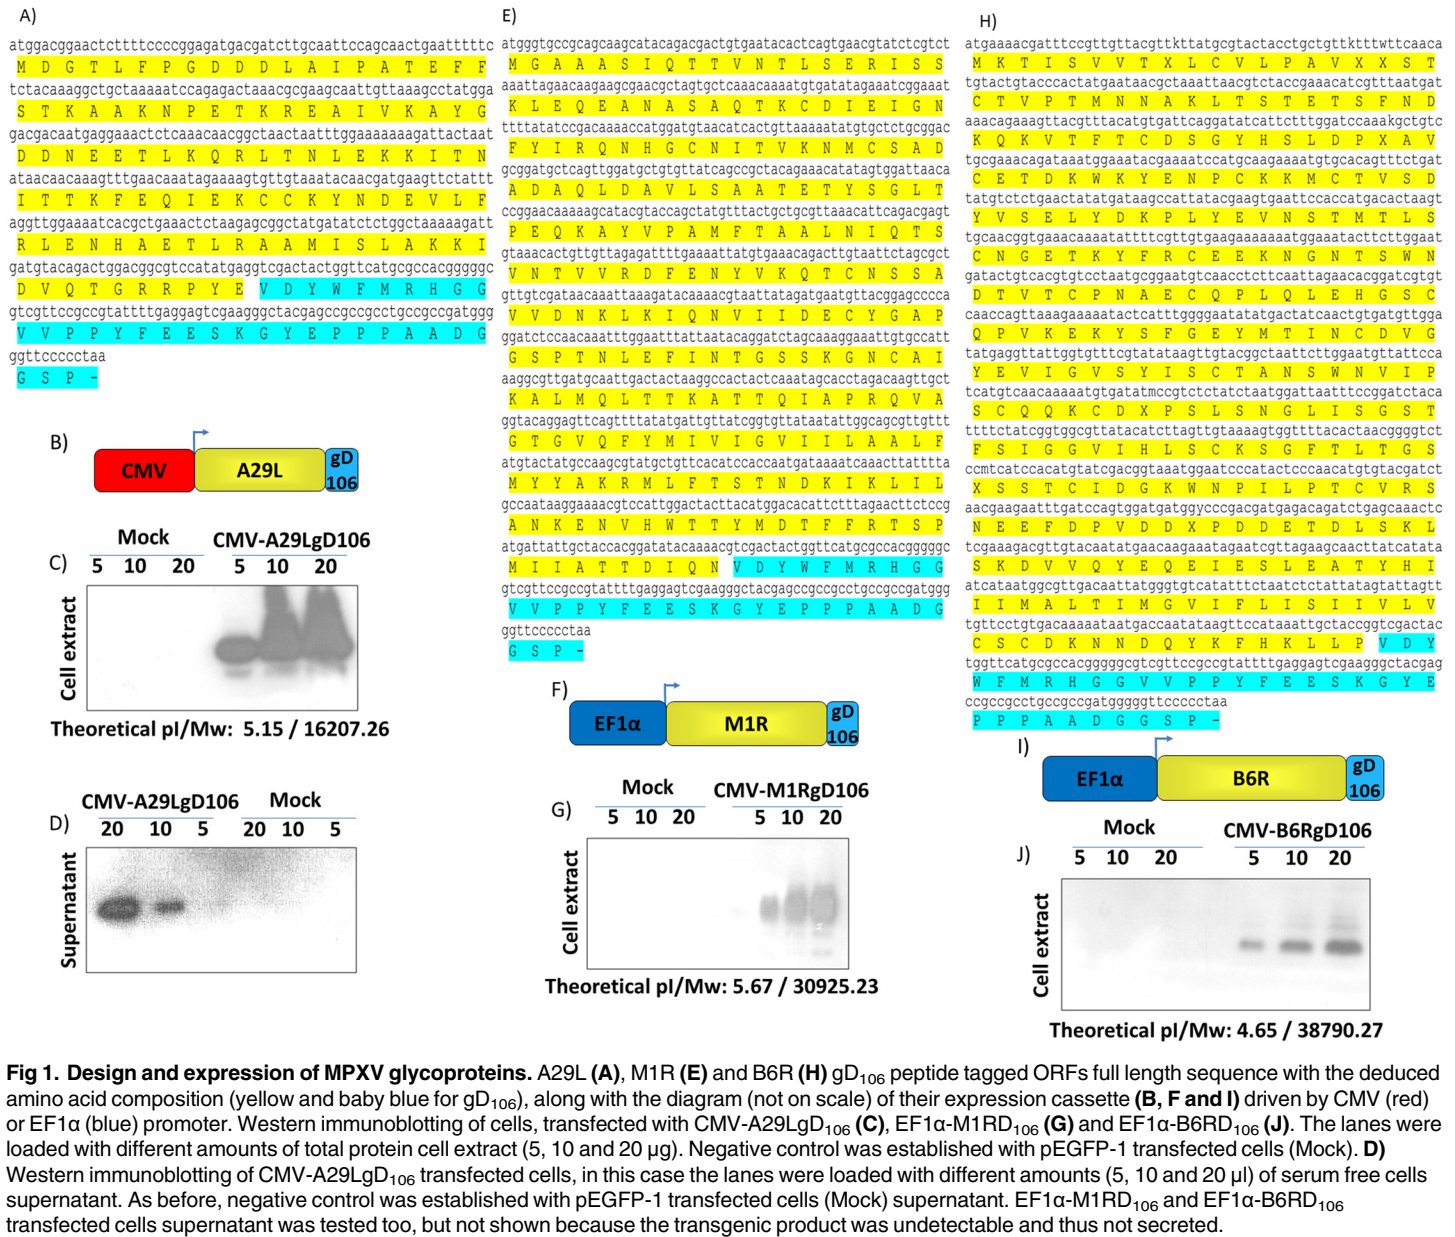

**Fig 1. Design and expression of MPXV glycoproteins.** A29L (A), M1R (E) and B6R (H) gD<sub>106</sub> peptide tagged ORFs full length sequence with the deduced amino acid composition (yellow and baby blue for gD<sub>106</sub>), along with the diagram (not on scale) of their expression cassette (B, F and I) driven by CMV (red) or EF1α (blue) promoter. Western immunoblotting of cells, transfected with CMV-A29LgD<sub>106</sub> (C), EF1α-M1RgD<sub>106</sub> (G) and EF1α-B6RgD<sub>106</sub> (J). The lanes were loaded with different amounts of total protein cell extract (5, 10 and 20 μg). Negative control was established with pEGFP-1 transfected cells (Mock). D) Western immunoblotting of CMV-A29LgD<sub>106</sub> transfected cells, in this case the lanes were loaded with different amounts (5, 10 and 20 μl) of serum free cells supernatant. As before, negative control was established with pEGFP-1 transfected cells (Mock) supernatant. EF1α-M1RgD<sub>106</sub> and EF1α-B6RgD<sub>106</sub> transfected cells supernatant was tested too, but not shown because the transgenic product was undetectable and thus not secreted.

doi:10.1371/journal.pntd.0003850.g001

1C, 1G and 1J), further A29LgD<sub>106</sub> was also secreted (Fig 1D) from the supernatant of the transiently transfected cells.

### Construction of BoHV-4s-based vector expressing A29L, M1R and B6RgD106 tagged antigens

An apathogenic strain of BoHV-4 cloned as a BAC was used to create a BoHV-4-A-based vector [28]. The TK BoHV-4-A genome locus was utilized as the integration site for the CMV-A29LgD<sub>106</sub>, EF1α-M1RgD<sub>106</sub> and EF1α-B6RgD<sub>106</sub> expression cassettes. The BoHV-4 TK genomic region is strongly conserved among BoHV-4 isolates [47], ensuring the stability of the genomic locus from potential recombination when foreign DNA sequences are inserted in.

Indeed, the BoHV-4 TK genomic locus has been interrupted by the insertion of foreign DNA sequences of different size, without interfering with viral replication *in vitro* and loss of heterologous protein expression [25,27–29,31,32,34]. CMV-A29LgD<sub>106</sub>, EF1α-M1RgD<sub>106</sub> and EF1α-B6RgD<sub>106</sub> expression cassettes were first sub-cloned into pINT2, a shuttle vector plasmid containing 2 BoHV-4 TK sequences [25], to generate pTK-CMV-A29LgD<sub>106</sub>-TK, pTK-EF1α-M1RgD<sub>106</sub>-TK and pTK-EF1α-B6RgD<sub>106</sub>-TK targeting vectors. Restriction enzyme linearized targeting vectors were used for heat-inducible homologous recombination SW102 *E. Coli* containing pBAC-BoHV-4-A-KanaGalKΔTK [28,39,48] (Fig 2A) to generate pBAC-BoHV-4-A-CMV-A29LgD<sub>106</sub>ΔTK, pBAC-BoHV-4-A-EF1α-M1RgD<sub>106</sub>ΔTK and pBAC-BoHV-4-A-EF1α-B6RgD<sub>106</sub>ΔTK. Selected clones were first analyzed by HindIII restriction enzyme digestion and then by southern blotting (Fig 2B). Because heat-inducible recombination in SW102 *E. Coli* and repeated passages could establish altered bacterial phenotypes due to an aberrant recombinases transcription, SW102 *E. Coli* carrying pBAC-BoHV-4-A-CMV-A29LgD<sub>106</sub>ΔTK, pBAC-BoHV-4-A-EF1α-M1RgD<sub>106</sub>ΔTK and pBAC-BoHV-4-A-EF1α-B6RgD<sub>106</sub>ΔTK were serially cultured over for 20 passages and checked by HindIII restriction enzyme digestion. No differences among restriction patterns at various passages were detected (S1 Fig), thus ensuring the stability of the clones.

### Recombinant BoHV-4s reconstitution and characterization

Infectious viable BoHV-4-A-CMV-A29LgD<sub>106</sub>ΔTK, BoHV-4-A-EF1α-M1RgD<sub>106</sub>ΔTK and BoHV-4-A-EF1α-B6RgD<sub>106</sub>ΔTK were obtained by electroporating pBAC-BoHV-4-A-CMV-A29LgD<sub>106</sub>ΔTK, pBAC-BoHV-4-A-EF1α-M1RgD<sub>106</sub>ΔTK and pBAC-BoHV-4-A-EF1α-B6RgD<sub>106</sub>ΔTK DNA into BEK and BEK*cre* cells. The only difference was that the recombinant viruses reconstituted from electroporated BEK*cre* resulted in depletion of the BAC plasmid backbone containing the GFP expression cassette, as shown by the loss of GFP expression (Fig 3A, 3E and 3H). Because the time necessary to reconstitute the viable recombinant BoHV-4s was different among them, it was of interest to know if the foreign antigens, encoded by the expression cassette integrated into the viral genome, could have a detrimental effect on the viral replication. Therefore, the growth characteristics of BoHV-4-A-CMV-A29LgD<sub>106</sub>ΔTK, BoHV-4-A-EF1α-M1RgD<sub>106</sub>ΔTK and BoHV-4-A-EF1α-B6RgD<sub>106</sub>ΔTK were compared with that of the parental virus, BoHV-4-A. Although BoHV-4-A-CMV-A29LgD<sub>106</sub>ΔTK and BoHV-4-A-EF1α-M1RgD<sub>106</sub>ΔTK demonstrated a slower replication kinetics respect to BoHV-4-A, they reached the same viral titer at the end-point (~10<sup>6</sup>) (Fig 3B and 3F). Whereas BoHV-4-A-EF1α-B6RgD<sub>106</sub>ΔTK replication was drastically impaired, a 2 log reduction of the viral titer end-point (~10<sup>4</sup>) respect to BoHV-4-A was observed (Fig 3I); however, transgene expression was well detected in the whole cell extract of BoHV-4-A-CMV-A29LgD<sub>106</sub>ΔTK, BoHV-4-A-EF1α-M1RgD<sub>106</sub>ΔTK and BoHV-4-A-EF1α-B6RgD<sub>106</sub>ΔTK infected cells (Fig 3C, 3G and 3J). Further, A29LgD<sub>106</sub> glycoprotein was found to be expressed as a secreted protein in the supernatant of BoHV-4-A-CMV-A29LgD<sub>106</sub>ΔTK infected cells (Fig 3D).

### *In vivo* efficacy testing of BoHV-4-A-CMV-A29LgD<sub>106</sub>ΔTK, BoHV-4-A-EF1α-M1RgD<sub>106</sub>ΔTK and BoHV-4-A-EF1α-B6RgD<sub>106</sub>ΔTK

To test the efficacy of the vectors *in vivo*, we sought to determine if they could protect mice against a lethal challenge with MPXV. Several murine strains have been developed as models of MPXV, in this study we utilized the 129 *stat1*<sup>-/-</sup> strain. Thirteen cages were prepared with 5 mice/cage (Table 2). Cages 1 and 2 were un-vaccinated. Cage 3 was vaccinated with vehicle (DMEM without FBS). Cages 4 and 5 were vaccinated with MVA where cage 4 received a primary injection of vaccine at T = 0 days and a vehicle booster at T = 23 days, and cage 5

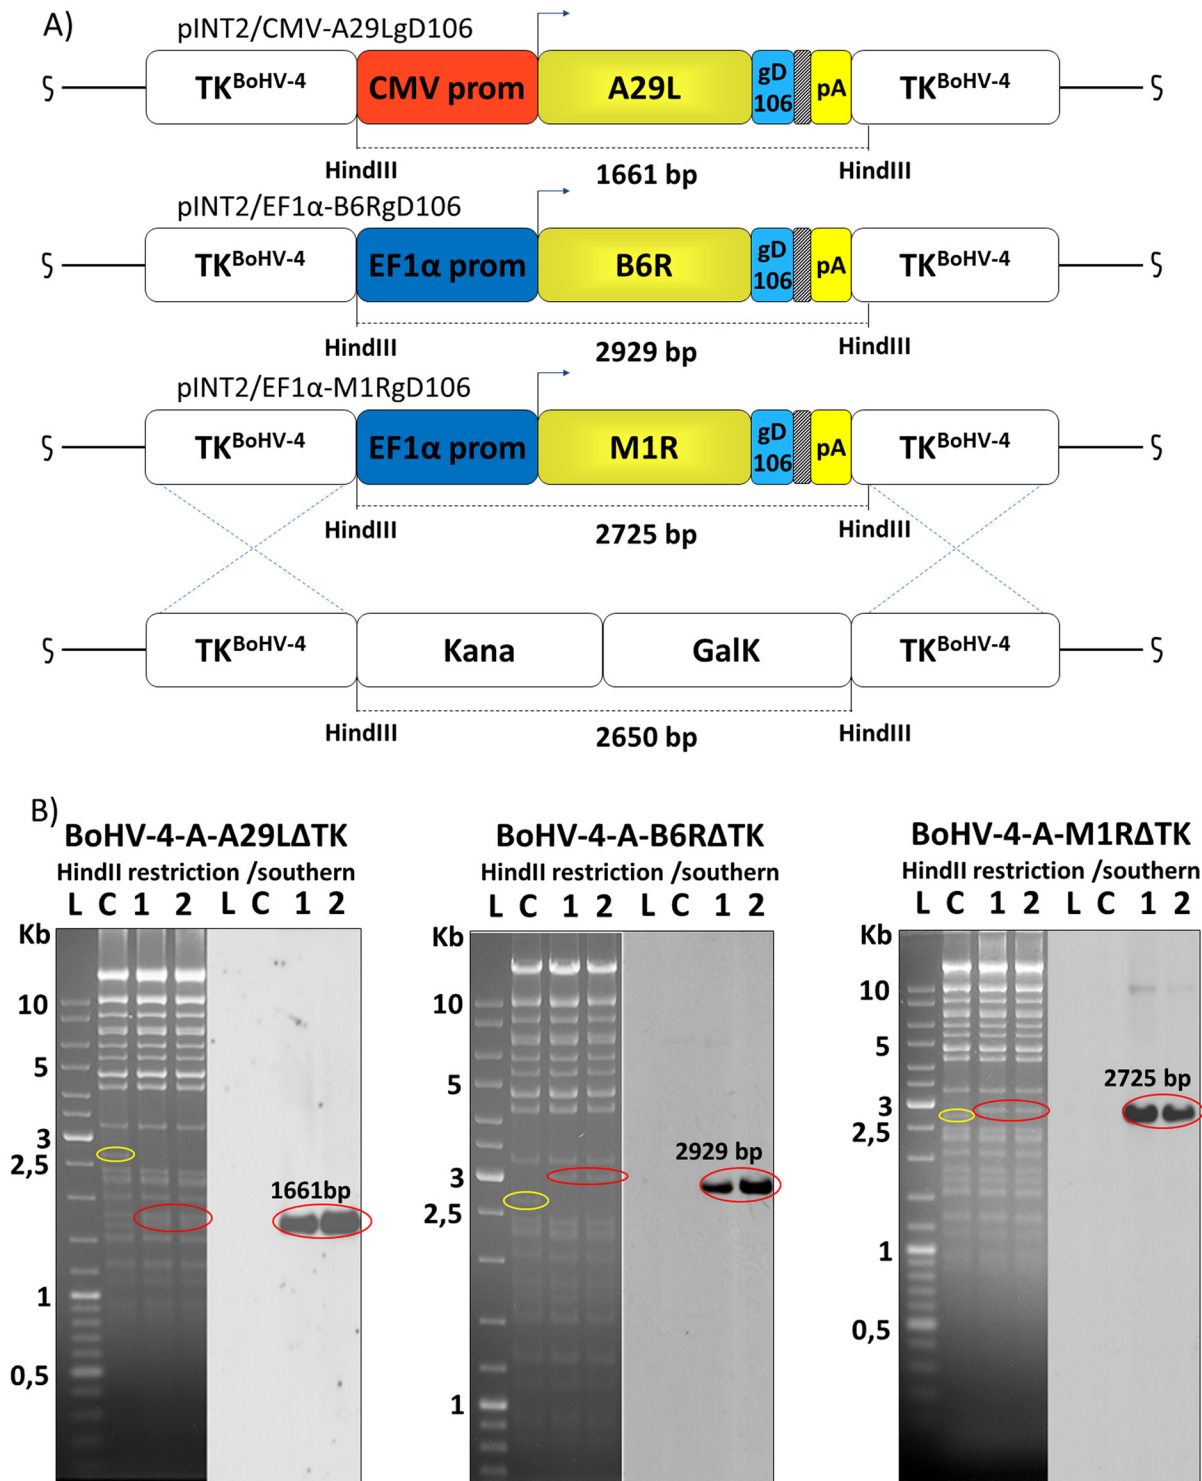

**Fig 2. Generation of recombinant BoHV-4s.** Diagram (not to scale; **A**) showing the retargeting event obtained by heat-inducible homologous recombination in SW102 containing pBAC-BoHV-4-A-TK-KanaGalk-TK, where the Kana/Galk cassette was replaced with the CMV-A29LgD<sub>106</sub>, EF1α-M1RgD<sub>106</sub> and EF1α-B6RgD<sub>106</sub> expression cassettes flanked by BoHV-4 TK sequences, located in pINT2 shuttle plasmid vector. **B**) Representative 2-deoxy-galactose resistant colonies (1 and 2) tested by HindIII restriction enzyme analysis, agar gel electrophoresis, and Southern blotting performed with specific probes for the A29L, M1R and B6R ORFs. The 2,650 bp band (yellow circle), corresponding to the un-retargeted pBAC-BoHV-4-A-TK-KanaGalk-TK control (C), has been replaced by a 1,661 bp band (red circle) in pBAC-BoHV-4-A-CMV-A29LgD<sub>106</sub>ΔTK, by a 2,929 bp band (red circle) in pBAC-BoHV-4-A-EF1α-B6RgD<sub>106</sub>ΔTK and by a 2,725 bp band (red circle) in pBAC-BoHV-4-A-EF1α-M1RgD<sub>106</sub>ΔTK.

doi:10.1371/journal.pntd.0003850.g002

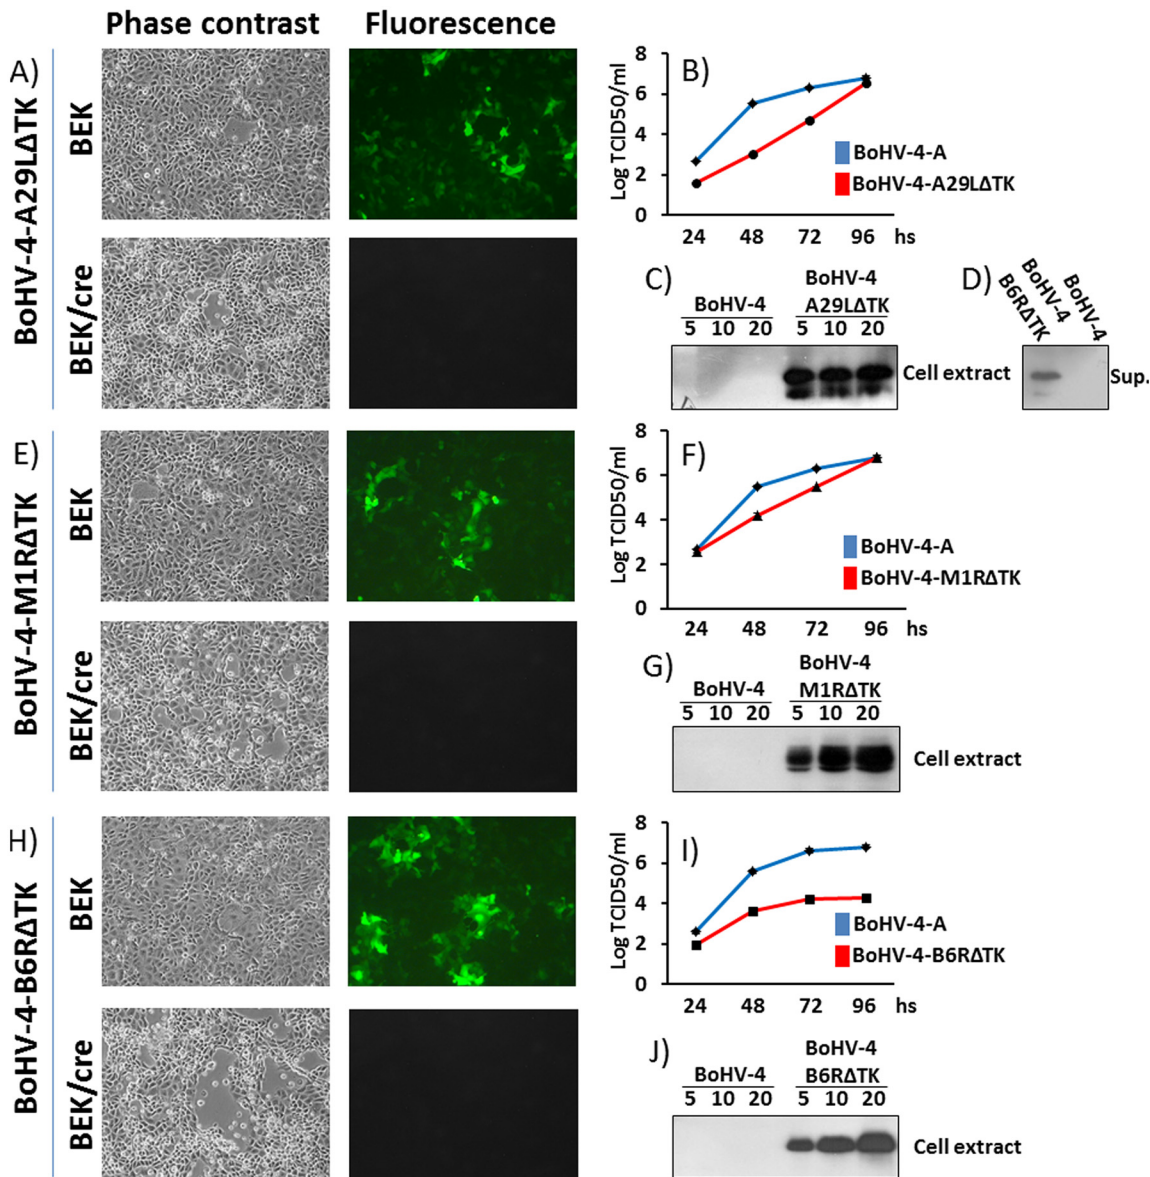

**Fig 3. Reconstitution and characterization of recombinant viruses.** Representative phase contrast and fluorescent microscopic images of plaques formed by viable reconstituted recombinant BoHV-4-A-CMV-A29LgD<sub>106</sub>ΔTK (A), BoHV-4-A-EF1α-M1RgD<sub>106</sub>ΔTK (E) and BoHV-4-A-EF1α-B6RgD<sub>106</sub>ΔTK (H) after the corresponding BAC DNA electroporation into BEK cells or in BEK cells expressing cre recombinase (Magnification, ×10). Replication kinetics of BoHV-4-A-CMV-A29LgD<sub>106</sub>ΔTK (B), BoHV-4-A-EF1α-M1RgD<sub>106</sub>ΔTK (F) and BoHV-4-A-EF1α-B6RgD<sub>106</sub>ΔTK (I) growth on BEK cells, compared with those of the parental BoHV-4-A isolate. The data presented are the means ± standard errors of triplicate measurements (*P*>0.05 for all time points as measured by Student's *t* test). Western immunoblotting of cells, infected with BoHV-4-A-CMV-A29LgD<sub>106</sub>ΔTK (C), BoHV-4-A-EF1α-M1RgD<sub>106</sub>ΔTK (G) and BoHV-4-A-EF1α-B6RgD<sub>106</sub>ΔTK (J). The lanes were loaded with different amounts of total protein cell extract (5, 10 and 20 μg). Negative control was established with BoHV-4-A infected cells. D) Western immunoblotting of BoHV-4-A-CMV-A29LgD<sub>106</sub>ΔTK infected cells; in this case the lanes were loaded with different amounts (5, 10 and 20 μl) of serum free cells supernatant. As before, negative control was established with BoHV-4-A infected cells supernatant. BoHV-4-A-EF1α-M1RgD<sub>106</sub>ΔTK and BoHV-4-A-EF1α-B6RgD<sub>106</sub>ΔTK infected cells supernatant were tested too, but not shown because the transgenic product was undetectable and thus not secreted.

doi:10.1371/journal.pntd.0003850.g003

received a primary injection of vaccine at T = 0 days and a booster injection of vaccine at T = 23 days. Similar vaccination regimens were performed on cages 6 and 7 (vaccinated with BoHV-4-A-CMV-A29LgD<sub>106</sub>ΔTK), cages 8 and 9 (vaccinated with BoHV-4-A-EF1α-M1RgD<sub>106</sub>ΔTK) and cages 10 and 11 (vaccinated with BoHV-4-A-EF1α-B6RgD<sub>106</sub>ΔTK).

Cages 12 and 13 were also vaccinated following the above regimen; however, these mice received a combination (combo) of the 3 BoHV-4 vectors. BoHV-4 vectors were injected IP in a total volume of 0.3 ml. There was no apparent morbidity—as measured visually—or weight-loss recorded in any of the mice (S2 Fig).

At T = 50 days, mice in cages 2–13 were challenged with  $2 \times 10^5$  PFU/mouse of MPXV. Mortality rates are shown in Fig 4. As expected, the MVA vaccinated mice in cages 4 (MVA/Veh) and 5 (MVA/MVA) were 100% protected against challenge. Mice in cage 9 (M1R/M1R) were also 100% protected ( $P = 0.004$ ); and although mice in cage 13 (Combo/Combo) experienced 1 death, they were still 80% protected against the MPXV challenge ( $P = 0.02$ ). When comparing weight-change (Fig 5), we found that mice in cage 5 (MVA/MVA) did not lose weight compared to the PBS control (cage 1) and that mice in cage 4 (MVA/Veh) only lost weight ( $\leq 5\%$ ) on days 6, 7 and 8 post challenge. We also found that mice in cages 10 (B6R/Veh), 11 (B6R/B6R), 12 (Combo/Veh), and 13 (Combo/Combo) had significantly reduced weight-loss from day 8 post challenge (15%, 15%, 11%, and 15% on day 8, respectively), even though mice in cage 13 were 80% protected against the challenge. Some protection from weight-loss was also afforded to mice in cages 8 (M1R/veh) and 9 (M1R/M1R) on days 13, 14 and 15 post challenge ( $\leq 15\%$ ).

These data indicate that the presence of M1R is required to protect the mice against challenge, and that a booster vaccination is required. It also indicates that a combination of the 3 vectors improves protection against weight-loss. Although M1R could provide protection, it was inferior to that provided by vaccination with MVA. The data also indicate that although B6R does not provide protection against mortality, it does provide protection against weight-loss in surviving mice (see above).

## Discussion

The aim of the current study was to ascertain the potential utility of Bovine herpesvirus 4 (BoHV-4)-based vectors as safe, potent, large-capacity vaccine vectors for category A agents—MPXV for this specific case. This study demonstrated protection in the STAT1<sup>-/-</sup> model and consideration should be given to also evaluating the vectors in CAST/EiJ mice which have also been established as a murine model of monkeypox [49,50]. Ultimately, this study could pave the way for further studies in other animal models such as prairie dogs (*Cynomys ludovicianus*) [51–53], the 13-lined ground squirrel (*Spermophilus tridecemlineatus*) [54,55] and non-human primates (reviewed in [1])—all of which have been extensively used as models of human monkeypox—and ultimately in human protection studies. In fact, since MPXV also infects humans and causes clinical-signs very similar to smallpox, it is classified as a category A select agent [56]. Primarily for ethical but also for cost reasons, C57BL/6 STAT1 knockout mice (STAT1<sup>-/-</sup>) were chosen as an *in vivo* model before progressing to gene delivery and immunogenicity studies in non-human primates. STAT1<sup>-/-</sup> mice are highly sensitive to MPXV and the disease course in MPXV infected STAT1<sup>-/-</sup> mice, characterized by weight loss and death by day 10 post infection—is similar to that observed in wild-type mice infected with mousepox/ectromelia virus (ECTV), the etiology agent of mousepox—and probably the best small animal model of smallpox [35,57]. Moreover it was revealed that antiviral therapy could protect mice to a degree similar to that of vaccination with Dryvax or MVA, supporting the use of STAT1<sup>-/-</sup> mice as a reliable model to evaluate orthopoxvirus prophylactics and therapeutics [35]. STAT1<sup>-/-</sup> mice were found to be sensitive to a wide number of pathogens due to the loss of STAT1, a key factor responsible for type 1 and 2 interferon (IFN) signaling [58–63]. BoHV-4-based vectors in wild type and immunocompromised mice behave as replicating incompetent viral vectors, showing absence of pathogenicity [31,32,64–66] and BoHV-4

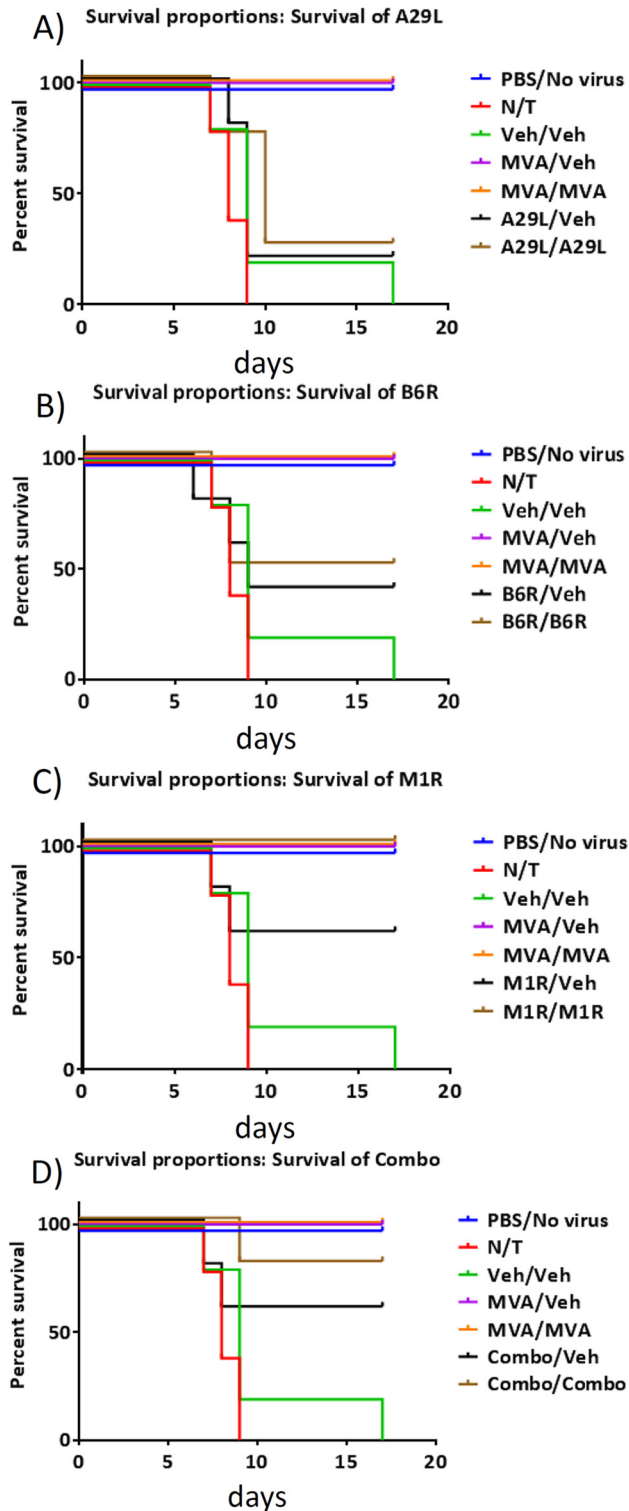

**Fig 4. Mortality in MPXV challenged mice.** Vaccinated and control mice were challenged with  $2 \times 10^5$  PFU of MPXV 50 days following the initial vaccination with MVA or BoHV-4 vectors A29L (A), M1R (B), B6R (C), or a combination of all 3 vectors (D). Mice were monitored for mortality. N = 5 mice per group.

doi:10.1371/journal.pntd.0003850.g004

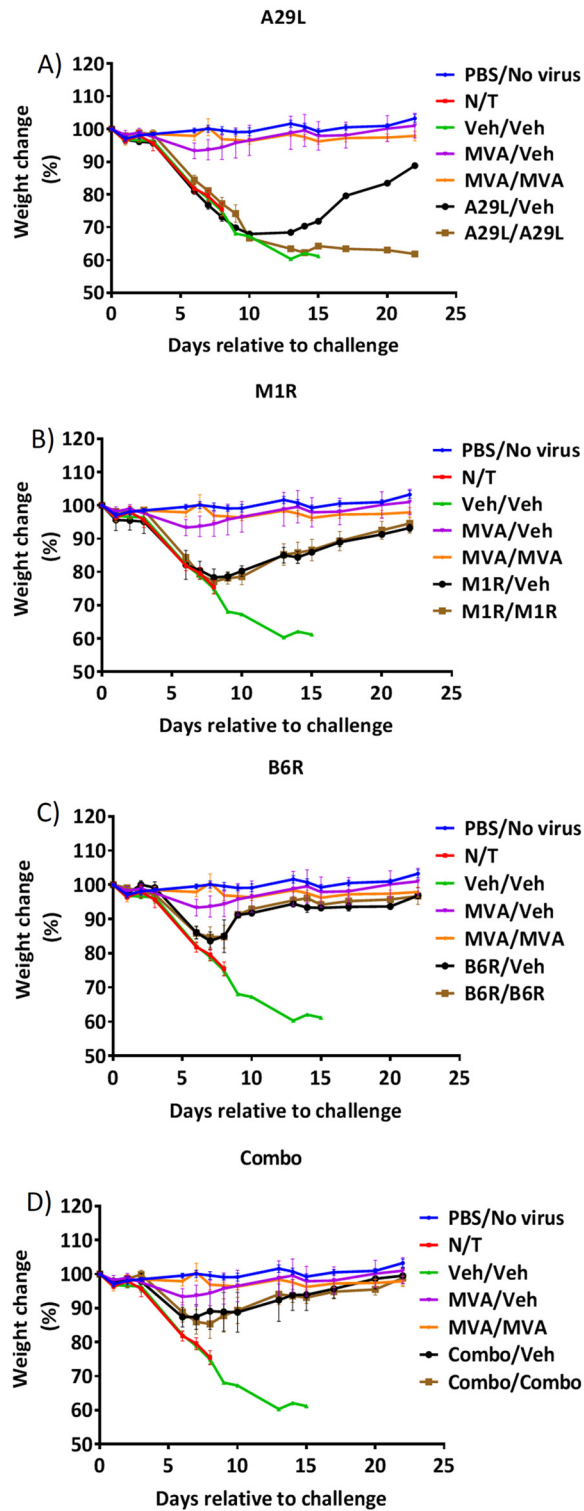

**Fig 5. Weight-change in MPXV challenged mice.** Vaccinated and control mice were challenged with  $2 \times 10^5$  PFU of MPXV 50 days following the initial vaccination with MVA or BoHV-4 vectors A29L (A), M1R (B), B6R (C), or a combination of all 3 vectors (D). Mice were monitored for weight-change. Error bars indicate SEM. N = 5 mice per group.

doi:10.1371/journal.pntd.0003850.g005

replication is strongly impaired *in vitro* after the treatment of BoHV-4 infected cells with IFN- $\gamma$  [67]. Considering that IFN- $\gamma$  is an activator of STAT1, the potential pathogenicity of BoHV-4-based vectors in STAT1<sup>(-/-)</sup> mice was a concern. However, intra peritoneal BoHV-4 inoculated STAT1<sup>(-/-)</sup> mice did not show any overt clinical sign, detrimental effect or pathology correlated to challenge.

A29L, M1R, and B6R MPXV antigens were selected, as candidate antigens to be delivered by BoHV-4-based vectors, as they are orthologous to A27L, L1R and B5R Vaccinia Virus (VV) antigens respectively. A27L is a 14 kDa protein thought to be involved in VV entry events [68]. L1R is a 23–29 kDa myristoylated surface protein involved in a yet-to-be-identified post viral attachment and pre-fusion events [69]. Whereas B5R is a 42 kDa glycoprotein found on the surface of the virus [70,71] and is involved in cell surface glycosaminoglycan-mediated disruption of the viral outer membrane [72]. Further, they were shown to be able to elicit a protective immune response in mice and non-human primates when formulated in combination as a sub-unit vaccine consisted of purified proteins, plasmid DNA vaccines, recombinant adenovirus and alphavirus replicons [73–79]. Since the purpose of this study was to determine the capability of BoHV-4-based viral vectors to protect STAT1<sup>(-/-)</sup> mice against a lethal MPXV infection, the first concern was the generation of optimized expression cassettes to be integrated into the BAC-BoHV-4-A genome that were able to efficiently express A29L, M1R and B6R antigens. Because no antibodies are available for A29L, M1R and B6R proteins, a short in-frame sequence coding for a tag peptide (gD<sub>106</sub>) was provided at the 3' end of their ORFs and this allowed their expression to be monitored by western immunoblotting. Initially A29L, M1R and B6R tagged ORFs were customized under the transcriptional control of the CMV promoter; however, the only ORF to be efficiently expressed was A29L. For this reason, the CMV promoter of the M1R and B6R expression cassette was substituted with the human EF1 $\alpha$  promoter which induced expression. The reason why the CMV promoter did not work with the ORFs of M1R and B6R has not been determined. Another interesting observation was the presence of A29L protein into the supernatant of the transfected cells despite the absence of a canonical signal peptide within the primary sequence of the protein as deduced by different signal peptide prediction software (<http://www.csbio.sjtu.edu.cn/bioinf/Signal-3L/>; <http://www.cbs.dtu.dk/services/SignalP/>; <http://phobius.sbc.su.se/>) [80,81]. In fact, the A29L protein analysis by SecretomeP (<http://www.cbs.dtu.dk/services/SecretomeP/>), a sequence based method for the prediction of mammalian secretory proteins targeted to the non-classical secretory pathway, included A29L within the group of non-classical secreted proteins like fibroblast growth factors, some interleukins and galectins.

BoHV-4 is considered a virus without a clear disease association, the existence of a BoHV-4 potentially pathogenic biotype cannot be absolutely excluded when a virus is going to be exploited as a gene delivery vector. Bovine herpesvirus 4 (BoHV-4) has been most consistently associated with uterine disease in postpartum cattle and BoHV-4 infection is often identified concurrently with bacteria that cause uterine diseases [82,83]. The association between BoHV-4 infection and uterine disease has been difficult to establish. It was suggested that there may be an association with bacterial endometritis which leads to secretion of prostaglandin E2 (PGE2) and then stimulation of viral replication by PGE2, TNF- $\alpha$  and lipopolysaccharide (LPS)—which causes further endometrial tissue damage and inflammation [84–86]. For this reason, a putative non-pathogenic strain of BoHV-4 (BoHV-4-A) isolated from the cell milk fraction of a healthy cow whose genome was cloned as a bacterial artificial chromosome (pBAC-BoHV-4-A) [28] was used. CMV-A29LgD<sub>106</sub>, EF1 $\alpha$ -M1RgD<sub>106</sub> and EF1 $\alpha$ -B6RgD<sub>106</sub> were integrated into the TK locus of pBAC-BoHV-4-A, and proved to be stable through passages in *E. coli* SW102 and recombinant viable BoHV-4-A-CMV-A29LgD<sub>106</sub> $\Delta$ TK, BoHV-4-A-EF1 $\alpha$ -M1RgD<sub>106</sub> $\Delta$ TK, BoHV-4-A-EF1 $\alpha$ -B6RgD<sub>106</sub> $\Delta$ TK were successfully reconstituted in



BEK<sup>Cre</sup> cells. When BoHV-4-A-CMV-A29LgD<sub>106</sub>ΔTK, BoHV-4-A-EF1α-M1RgD<sub>106</sub>ΔTK and BoHV-4-A-EF1α-B6RgD<sub>106</sub>ΔTK were characterized in terms of replication kinetics, a reduction of replication was observed for BoHV-4-A-EF1α-B6RgD<sub>106</sub>ΔTK and this was attributed to a partial toxic effect induced by the abundant expression of B6RgD<sub>106</sub>—which was also observed in transfections of cells with EF1α-B6RgD<sub>106</sub> expression cassette. This latter observation excluded a potential detrimental effect induced by the topological location of the foreign DNA in the BoHV-4 genome. Despite their replication characteristics, all three recombinant BoHV-4s abundantly expressed their transgene in infected cells.

*In vivo* protection studies determined that M1R protected against a lethal MPXV challenge. One hundred % protection was achieved when the vectors were administered twice (prime followed by booster), although the M1R expression vector was not superior to vaccination with MVA as measured by weight-loss. Protection was also afforded to mice when the vectors were administered in combination (combo) as a prime and booster. These mice experienced less weight-loss than mice vaccinated with M1R alone. This finding is surprising as the other vectors included in the combo were not protective when administered individually, although we did find protection against weight-loss when mice were treated with B6R alone. Nevertheless, our studies reveal that protection can be afforded even when a small number of mice are used. Further studies should be considered that increase the dose of vector administered to the mice. Also, since the combination of all 3 vectors gave 80% protection against mortality and morbidity, various vector permutations should be considered to elucidate the most efficacious combination and ratio of vectors.

No overt clinical-signs were observed following vaccination with the prime or booster injection, suggesting low immuno-reactivity and therefore possibly low-levels of adverse events in NHPs and humans. Although second generation live vaccines, such as ACAM2000, provide the most robust immune response, they are quite reactogenic and induce some level of morbidity in all vaccines. Furthermore, a significant portion of the human population are contraindicated to vaccination with first- and second-generation vaccines [19]. MVA is a non-replicating vaccine that has demonstrated efficacy in many animal trials. The main draw-back to MVA is its relatively low immunogenicity, meaning that booster administrations are usually required for 100% protection against morbidity and mortality [87,88]. Future studies could reveal that vectors' studied here could be used as alternatives to MVA.

In summary, our findings have demonstrated that BoHV-4 based vectors can be used as vaccines to protect against a lethal MPXV challenge in mice. Our studies utilized STAT1<sup>(-/-)</sup> mice; however, other strains have demonstrated sensitivity to MPXV, namely the CASTE/Eij strain [49,50,89]. Future studies should consider evaluating the protection of these vectors in this strain also. This work provides a “proof-of-concept” for the BoHV-4-based vector as a potential vaccine for category A agents. Future and ongoing studies are focused on the design of BoHV-4-based vectors expressing antigens from other category A pathogens, as well as an assessment of protection in non-human primate.

## Supporting Information

**S1 Fig. Stability of the pBAC-BoHV-4-A-CMV-A29LgD<sub>106</sub>ΔTK, pBAC-BoHV-4-A-EF1α-M1RgD<sub>106</sub>ΔTK and pBAC-BoHV-4-A-EF1α-B6RgD<sub>106</sub>ΔTK plasmids in *E. coli* SW102 cells.**

(TIF)

**S2 Fig. Groups of mice were vaccinated with the BoHV-4 vectors containing A29R (A), M1R (B), B6R (C) or a combination of all 3 vectors (D). PBS was used as a negative control and MVA was used as a positive control for vaccination. Vaccines were administered at T = 0**

days or at T = 0 days and T = 23 days (booster). Mice were monitored for weight-change from T = 0 days to T = 42 days. All mice gained or maintained weight during this period. Error bars indicate SEM. N = 5 mice per group. (TIF)

## Acknowledgments

We would like to thank Alfonso Rosamilia for technical assistance.

## Author Contributions

Conceived and designed the experiments: GD SP MRB. Performed the experiments: VF SP SJ RWC KD EH DP GT GD. Analyzed the data: GD SP. Contributed reagents/materials/analysis tools: RDE SWW. Wrote the paper: GD SP MRB.

## References

1. Parker S, Buller RM (2013) A review of experimental and natural infections of animals with monkeypox virus between 1958 and 2012. *Future Virol* 8: 129–157. PMID: [23626656](#)
2. Parker S, Nuara A, Buller RM, Schultz DA (2007) Human monkeypox: an emerging zoonotic disease *Future Microbiol* 2: 17–34. PMID: [17661673](#)
3. Breman JG, Henderson DA (2002) Diagnosis and management of smallpox. *N Engl J Med* 346: 1300–1308. PMID: [11923491](#)
4. Damon IK (2011) Status of human monkeypox: clinical disease, epidemiology and research. *Vaccine* 29 Suppl 4: D54–59. doi: [10.1016/j.vaccine.2011.04.014](#) PMID: [22185831](#)
5. Nalca A, Rimoin AW, Bavari S, Whitehouse CA (2005) Reemergence of monkeypox: prevalence, diagnostics, and countermeasures. *Clin Infect Dis* 41: 1765–1771. PMID: [16288402](#)
6. Meyer H, Perrichot M, Stemmler M, Emmerich P, Schmitz H, et al. (2002) Outbreaks of disease suspected of being due to human monkeypox virus infection in the Democratic Republic of Congo in 2001. *J Clin Microbiol* 40: 2919–2921. PMID: [12149352](#)
7. Likos AM, Sammons SA, Olson VA, Frace AM, Li Y, et al. (2005) A tale of two clades: monkeypox viruses. *J Gen Virol* 86: 2661–2672. PMID: [16186219](#)
8. Chen N, Li G, Liszewski MK, Atkinson JP, Jahrling PB, et al. (2005) Virulence differences between monkeypox virus isolates from West Africa and the Congo basin. *Virology* 340: 46–63. PMID: [16023693](#)
9. Jezek Z, Fenner F (1988) Human monkeypox; Melnick JL, editor. Basel: Karger.
10. Jezek Z, Grab B, Szczeniowski M, Paluku KM, Mutombo M (1988) Clinico-epidemiological features of monkeypox patients with an animal or human source of infection. *Bull World Health Organ* 66: 459–464. PMID: [2844428](#)
11. CDC (2003) Multistate outbreak of monkeypox—Illinois, Indiana, and Wisconsin, 2003. *MMWR Morb Mortal Wkly Rep* 52: 537–540. PMID: [12803191](#)
12. Reed KD, Melski JW, Graham MB, Regnery RL, Sotir MJ, et al. (2004) The detection of monkeypox in humans in the Western Hemisphere. *N Engl J Med* 350: 342–350. PMID: [14736926](#)
13. Fenner F, Henderson DA, Arita I, Jezek Z, Ladnyi ID (1988) Smallpox and its eradication. Geneva: World Health Organisation.
14. Berthet N, Nakoune E, Whist E, Selekon B, Burguiere AM, et al. (2011) Maculopapular lesions in the Central African Republic. *Lancet* 378: 1354. doi: [10.1016/S0140-6736\(11\)61142-2](#) PMID: [21982097](#)
15. Ellis CK, Carroll DS, Lash RR, Peterson AT, Damon IK, et al. (2012) Ecology and geography of human monkeypox case occurrences across Africa. *J Wildl Dis* 48: 335–347. PMID: [22493109](#)
16. Formenty P, Muntasir MO, Damon I, Chowdhary V, Opoka ML, et al. (2010) Human monkeypox outbreak caused by novel virus belonging to Congo Basin clade, Sudan, 2005. *Emerg Infect Dis* 16: 1539–1545. doi: [10.3201/eid1610.100713](#) PMID: [20875278](#)
17. Learned LA, Reynolds MG, Wassa DW, Li Y, Olson VA, et al. (2005) Extended interhuman transmission of monkeypox in a hospital community in the Republic of the Congo, 2003. *Am J Trop Med Hyg* 73: 428–434. PMID: [16103616](#)

18. Rimoin AW, Mulembakani PM, Johnston SC, Lloyd Smith JO, Kitalu NK, et al. (2010) Major increase in human monkeypox incidence 30 years after smallpox vaccination campaigns cease in the Democratic Republic of Congo. *Proc Natl Acad Sci U S A* 107: 16262–16267. doi: [10.1073/pnas.1005769107](https://doi.org/10.1073/pnas.1005769107) PMID: [20805472](https://pubmed.ncbi.nlm.nih.gov/20805472/)
19. Handley L, Buller RM, Frey SE, Bellone C, Parker S (2009) The new ACAM2000 vaccine and other therapies to control orthopoxvirus outbreaks and bioterror attacks. *Expert Rev Vaccines* 8: 841–850. doi: [10.1586/erv.09.55](https://doi.org/10.1586/erv.09.55) PMID: [19538111](https://pubmed.ncbi.nlm.nih.gov/19538111/)
20. Handley LM, Mackey JP, Buller RML, Bellone CJ (2007) *Orthopoxvirus Vaccines and Vaccination*. Birkhauser Basel. pp. 329–353.
21. Stittelaar KJ, Neyts J, Naesens L, van Amerongen G, van Lavieren RF, et al. (2006) Antiviral treatment is more effective than smallpox vaccination upon lethal monkeypox virus infection. *Nature* 439: 745–748. PMID: [16341204](https://pubmed.ncbi.nlm.nih.gov/16341204/)
22. Wei H, Huang D, Fortman J, Wang R, Shao L, et al. (2009) Coadministration of cidofovir and smallpox vaccine reduced vaccination side effects but interfered with vaccine-elicited immune responses and immunity to monkeypox. *J Virol* 83: 1115–1125. doi: [10.1128/JVI.00984-08](https://doi.org/10.1128/JVI.00984-08) PMID: [19004937](https://pubmed.ncbi.nlm.nih.gov/19004937/)
23. Osorio FA, Reed DE (1983) Experimental inoculation of cattle with bovine herpesvirus-4: evidence for a lymphoid-associated persistent infection. *Am J Vet Res* 44: 975–980. PMID: [6307096](https://pubmed.ncbi.nlm.nih.gov/6307096/)
24. Donofrio G, van Santen VL (2001) A bovine macrophage cell line supports bovine herpesvirus-4 persistent infection. *J Gen Virol* 82: 1181–1185. PMID: [11297693](https://pubmed.ncbi.nlm.nih.gov/11297693/)
25. Donofrio G, Cavirani S, Simone T, van Santen VL (2002) Potential of bovine herpesvirus 4 as a gene delivery vector. *J Virol Methods* 101: 49–61. PMID: [11849683](https://pubmed.ncbi.nlm.nih.gov/11849683/)
26. Donofrio G, Cavirani S, Vanderplasschen A, Gillet L, Flammini CF (2006) Recombinant bovine herpesvirus 4 (BoHV-4) expressing glycoprotein D of BoHV-1 is immunogenic and elicits serum-neutralizing antibodies against BoHV-1 in a rabbit model. *Clin Vaccine Immunol* 13: 1246–1254. PMID: [16928886](https://pubmed.ncbi.nlm.nih.gov/16928886/)
27. Donofrio G, Sartori C, Ravanetti L, Cavirani S, Gillet L, et al. (2007) Establishment of a bovine herpesvirus 4 based vector expressing a secreted form of the bovine viral diarrhoea virus structural glycoprotein E2 for immunization purposes. *BMC Biotechnol* 7: 68. PMID: [17945009](https://pubmed.ncbi.nlm.nih.gov/17945009/)
28. Donofrio G, Sartori C, Franceschi V, Capocefalo A, Cavirani S, et al. (2008) Double immunization strategy with a BoHV-4-vectorialized secreted chimeric peptide BVDV-E2/BoHV-1-gD. *Vaccine* 26: 6031–6042. doi: [10.1016/j.vaccine.2008.09.023](https://doi.org/10.1016/j.vaccine.2008.09.023) PMID: [18812200](https://pubmed.ncbi.nlm.nih.gov/18812200/)
29. Donofrio G, Franceschi V, Capocefalo A, Taddei S, Sartori C, et al. (2009) Cellular targeting of engineered heterologous antigens is a determinant factor for bovine herpesvirus 4-based vaccine vector development. *Clin Vaccine Immunol* 16: 1675–1686. doi: [10.1128/CVI.00224-09](https://doi.org/10.1128/CVI.00224-09) PMID: [19793901](https://pubmed.ncbi.nlm.nih.gov/19793901/)
30. Donofrio G, Taddei S, Franceschi V, Capocefalo A, Cavirani S, et al. (2011) Swine adipose stromal cells loaded with recombinant bovine herpesvirus 4 virions expressing a foreign antigen induce potent humoral immune responses in pigs. *Vaccine* 29: 867–872. doi: [10.1016/j.vaccine.2010.11.048](https://doi.org/10.1016/j.vaccine.2010.11.048) PMID: [21115049](https://pubmed.ncbi.nlm.nih.gov/21115049/)
31. Redaelli M, Franceschi V, Capocefalo A, D'Avella D, Denaro L, et al. (2012) Herpes simplex virus type 1 thymidine kinase-armed bovine herpesvirus type 4-based vector displays enhanced oncolytic properties in immunocompetent orthotopic syngenic mouse and rat glioma models. *Neuro Oncol* 14: 288–301. doi: [10.1093/neuonc/nor219](https://doi.org/10.1093/neuonc/nor219) PMID: [22228853](https://pubmed.ncbi.nlm.nih.gov/22228853/)
32. Franceschi V, Capocefalo A, Calvo-Pinilla E, Redaelli M, Mucignat-Caretta C, et al. (2011) Immunization of knock-out alpha/beta interferon receptor mice against lethal bluetongue infection with a BoHV-4-based vector expressing BTV-8 VP2 antigen. *Vaccine* 29: 3074–3082. doi: [10.1016/j.vaccine.2011.01.075](https://doi.org/10.1016/j.vaccine.2011.01.075) PMID: [21320537](https://pubmed.ncbi.nlm.nih.gov/21320537/)
33. Donofrio G, Martignani E, Poli E, Lange C, Martini FM, et al. (2006) Bovine herpesvirus 4 based vector interaction with liver cells in vitro and in vivo. *J Virol Methods* 136: 126–136. PMID: [16712963](https://pubmed.ncbi.nlm.nih.gov/16712963/)
34. Donofrio G, Franceschi V, Lovero A, Capocefalo A, Camero M, et al. (2013) Clinical protection of goats against CpHV-1 induced genital disease with a BoHV-4-based vector expressing CpHV-1 gD. *PLoS One* 8: e52758. doi: [10.1371/journal.pone.0052758](https://doi.org/10.1371/journal.pone.0052758) PMID: [23300989](https://pubmed.ncbi.nlm.nih.gov/23300989/)
35. Stabenow J, Buller RM, Schriewer J, West C, Sagartz JE, et al. (2010) A mouse model of lethal infection for evaluating prophylactics and therapeutics against Monkeypox virus. *J Virol* 84: 3909–3920. doi: [10.1128/JVI.02012-09](https://doi.org/10.1128/JVI.02012-09) PMID: [20130052](https://pubmed.ncbi.nlm.nih.gov/20130052/)
36. Vollmar J, Arndtz N, Eckl KM, Thomsen T, Petzold B, et al. (2006) Safety and immunogenicity of IMVA-MUNE, a promising candidate as a third generation smallpox vaccine. *Vaccine* 24: 2065–2070. PMID: [16337719](https://pubmed.ncbi.nlm.nih.gov/16337719/)
37. Capocefalo A, Franceschi V, Mertens PP, Castillo-Olivares J, Cavirani S, et al. Expression and secretion of Bluetongue virus serotype 8 (BTV-8)VP2 outer capsid protein by mammalian cells. *J Virol Methods* 169: 420–424. doi: [10.1016/j.jviromet.2010.08.002](https://doi.org/10.1016/j.jviromet.2010.08.002) PMID: [20705105](https://pubmed.ncbi.nlm.nih.gov/20705105/)

38. Franceschi V, Stellari FF, Mangia C, Jacca S, Lavrentiadou S, et al. In vivo image analysis of BoHV-4-based vector in mice. *PLoS One* 9: e95779. doi: [10.1371/journal.pone.0095779](https://doi.org/10.1371/journal.pone.0095779) PMID: [24752229](https://pubmed.ncbi.nlm.nih.gov/24752229/)
39. Franceschi V, Capocefalo A, Cavirani S, Donofrio G (2013) Bovine herpesvirus 4 glycoprotein B is indispensable for lytic replication and irreplaceable by VSVg. *BMC Vet Res* 9: 6. doi: [10.1186/1746-6148-9-6](https://doi.org/10.1186/1746-6148-9-6) PMID: [23302472](https://pubmed.ncbi.nlm.nih.gov/23302472/)
40. Zaucha GM, Jahrling PB, Geisbert TW, Swearengen JR, Hensley L (2001) The pathology of experimental aerosolized monkeypox virus infection in cynomolgus monkeys (*Macaca fascicularis*). *Lab Invest* 81: 1581–1600. PMID: [11742030](https://pubmed.ncbi.nlm.nih.gov/11742030/)
41. Moss B, Earl PL (1998) Expression of proteins in mammalian cells using vaccinia virus vectors. Overview of the vaccinia virus expression system. *Current Protocols in Molecular Biology*: Wiley. pp. 16.15.11–16.15.15.
42. Chen W, Drillien R, Spehner D, Buller RM (1992) Restricted replication of ectromelia virus in cell culture correlates with mutations in virus-encoded host range gene. *Virology* 187: 433–442. PMID: [1546448](https://pubmed.ncbi.nlm.nih.gov/1546448/)
43. Wallace GD, Buller RM (1985) Kinetics of ectromelia virus (mousepox) transmission and clinical response in C57BL/6j, BALB/cByj and AKR/J inbred mice. *Lab Anim Sci* 35: 41–46. PMID: [2984458](https://pubmed.ncbi.nlm.nih.gov/2984458/)
44. Warming S, Costantino N, Court DL, Jenkins NA, Copeland NG (2005) Simple and highly efficient BAC recombineering using galK selection. *Nucleic Acids Res* 33: e36. PMID: [15731329](https://pubmed.ncbi.nlm.nih.gov/15731329/)
45. Esteban D, Parker S, Schriewer J, Hartzler H, Buller RM (2012) Mousepox, a small animal model of smallpox. *Methods Mol Biol* 890: 177–198. doi: [10.1007/978-1-61779-876-4\\_11](https://doi.org/10.1007/978-1-61779-876-4_11) PMID: [22688768](https://pubmed.ncbi.nlm.nih.gov/22688768/)
46. Capocefalo A, Franceschi V, Mertens PP, Castillo-Olivares J, Cavirani S, et al. (2010) Expression and secretion of Bluetongue virus serotype 8 (BTV-8) VP2 outer capsid protein by mammalian cells. *J Virol Methods* 169: 420–424. doi: [10.1016/j.jviromet.2010.08.002](https://doi.org/10.1016/j.jviromet.2010.08.002) PMID: [20705105](https://pubmed.ncbi.nlm.nih.gov/20705105/)
47. Donofrio G, Cavirani S, van Santen V, Flammini CF (2005) Potential secondary pathogenic role for bovine herpesvirus 4. *J Clin Microbiol* 43: 3421–3426. PMID: [16000468](https://pubmed.ncbi.nlm.nih.gov/16000468/)
48. Capocefalo A, Mangia C, Franceschi V, Jacca S, van Santen VL, et al. (2013) Efficient heterologous antigen gene delivery and expression by a replication-attenuated BoHV-4-based vaccine vector. *Vaccine* 31: 3906–3914. doi: [10.1016/j.vaccine.2013.06.052](https://doi.org/10.1016/j.vaccine.2013.06.052) PMID: [23830977](https://pubmed.ncbi.nlm.nih.gov/23830977/)
49. Americo JL, Moss B, Earl PL (2010) Identification of wild-derived inbred mouse strains highly susceptible to monkeypox virus infection for use as small animal models. *J Virol* 84: 8172–8180. doi: [10.1128/JVI.00621-10](https://doi.org/10.1128/JVI.00621-10) PMID: [20519404](https://pubmed.ncbi.nlm.nih.gov/20519404/)
50. Earl PL, Americo JL, Moss B (2012) Lethal monkeypox virus infection of CAST/EiJ mice is associated with a deficient gamma interferon response. *J Virol* 86: 9105–9112. doi: [10.1128/JVI.00162-12](https://doi.org/10.1128/JVI.00162-12) PMID: [22696658](https://pubmed.ncbi.nlm.nih.gov/22696658/)
51. Xiao SY, Sbrana E, Watts DM, Siirin M, da Rosa AP, et al. (2005) Experimental infection of prairie dogs with monkeypox virus. *Emerg Infect Dis* 11: 539–545. PMID: [15829191](https://pubmed.ncbi.nlm.nih.gov/15829191/)
52. Guarner J, Johnson BJ, Paddock CD, Shieh WJ, Goldsmith CS, et al. (2004) Monkeypox transmission and pathogenesis in prairie dogs. *Emerg Infect Dis* 10: 426–431. PMID: [15109408](https://pubmed.ncbi.nlm.nih.gov/15109408/)
53. Hutson CL, Carroll DS, Gallardo-Romero N, Weiss S, Clemmons C, et al. (2011) Monkeypox disease transmission in an experimental setting: prairie dog animal model. *PLoS One* 6: e28295. doi: [10.1371/journal.pone.0028295](https://doi.org/10.1371/journal.pone.0028295) PMID: [22164263](https://pubmed.ncbi.nlm.nih.gov/22164263/)
54. Tesh RB, Watts DM, Sbrana E, Siirin M, Popov VL, et al. (2004) Experimental infection of ground squirrels (*Spermophilus tridecemlineatus*) with monkeypox virus. *Emerg Infect Dis* 10: 1563–1567. PMID: [15498157](https://pubmed.ncbi.nlm.nih.gov/15498157/)
55. Sbrana E, Xiao SY, Newman PC, Tesh RB (2007) Comparative pathology of North American and central African strains of monkeypox virus in a ground squirrel model of the disease. *Am J Trop Med Hyg* 76: 155–164. PMID: [17255245](https://pubmed.ncbi.nlm.nih.gov/17255245/)
56. Parker S, Nuara A, Buller RM, Schultz DA (2007) Human monkeypox: an emerging zoonotic disease. *Future Microbiol* 2: 17–34. PMID: [17661673](https://pubmed.ncbi.nlm.nih.gov/17661673/)
57. Esteban DJ, Buller RM (2005) Ectromelia virus: the causative agent of mousepox. *J Gen Virol* 86: 2645–2659. PMID: [16186218](https://pubmed.ncbi.nlm.nih.gov/16186218/)
58. Gavrilescu LC, Butcher BA, Del Rio L, Taylor GA, Denkers EY (2004) STAT1 is essential for antimicrobial effector function but dispensable for gamma interferon production during *Toxoplasma gondii* infection. *Infect Immun* 72: 1257–1264. PMID: [14977926](https://pubmed.ncbi.nlm.nih.gov/14977926/)
59. Hogan RJ, Gao G, Rowe T, Bell P, Flieder D, et al. (2004) Resolution of primary severe acute respiratory syndrome-associated coronavirus infection requires Stat1. *J Virol* 78: 11416–11421. PMID: [15452265](https://pubmed.ncbi.nlm.nih.gov/15452265/)
60. Mumphrey SM, Changotra H, Moore TN, Heimann-Nichols ER, Wobus CE, et al. (2007) Murine norovirus 1 infection is associated with histopathological changes in immunocompetent hosts, but clinical

disease is prevented by STAT1-dependent interferon responses. *J Virol* 81: 3251–3263. PMID: [17229692](#)

61. Rothfuchs AG, Trumstedt C, Mattei F, Schiavoni G, Hidmark A, et al. (2006) STAT1 regulates IFN-alpha beta- and IFN-gamma-dependent control of infection with Chlamydia pneumoniae by nonhemopoietic cells. *J Immunol* 176: 6982–6990. PMID: [16709859](#)
62. Shornick LP, Wells AG, Zhang Y, Patel AC, Huang G, et al. (2008) Airway epithelial versus immune cell Stat1 function for innate defense against respiratory viral infection. *J Immunol* 180: 3319–3328. PMID: [18292557](#)
63. Sugawara I, Yamada H, Mizuno S (2004) STAT1 knockout mice are highly susceptible to pulmonary mycobacterial infection. *Tohoku J Exp Med* 202: 41–50. PMID: [14738323](#)
64. Donofrio G, Cavaggioni A, Bondi M, Cavirani S, Flammini CF, et al. (2006) Outcome of bovine herpesvirus 4 infection following direct viral injection in the lateral ventricle of the mouse brain. *Microbes Infect* 8: 898–904. PMID: [16503181](#)
65. Puppo A, Cesi G, Marrocco E, Piccolo P, Jacca S, et al. (2014) Retinal transduction profiles by high-capacity viral vectors. *Gene Ther* 21: 855–865. doi: [10.1038/gt.2014.57](#) PMID: [24989814](#)
66. Franceschi V, Stellari FF, Mangia C, Jacca S, Lavrentiadou S, et al. (2014) In vivo image analysis of BoHV-4-based vector in mice. *PLoS One* 9: e95779. doi: [10.1371/journal.pone.0095779](#) PMID: [24752229](#)
67. Jacca S, Franceschi V, Agosti M, Cavirani S, Mistretta F, et al. (2014) Interferon Gamma Mediated BoHV-4 Replication Restriction in Bovine Endometrial Stromal Cells Is Host IDO1 Gene Expression Independent and BoHV-4 IE2 Gene Expression Dependent. *Biol Reprod*.
68. Rodriguez JF, Paez E, Esteban M (1987) A 14,000-Mr envelope protein of vaccinia virus is involved in cell fusion and forms covalently linked trimers. *J Virol* 61: 395–404. PMID: [3806791](#)
69. Moss B, Shisler JL (2001) Immunology 101 at poxvirus U: immune evasion genes. *Semin Immunol* 13: 59–66. PMID: [11289800](#)
70. Engelstad M, Smith GL (1993) The vaccinia virus 42-kDa envelope protein is required for the envelopment and egress of extracellular virus and for virus virulence. *Virology* 194: 627–637. PMID: [8503178](#)
71. Isaacs SN, Wolffe EJ, Payne LG, Moss B (1992) Characterization of a vaccinia virus-encoded 42-kilodalton class I membrane glycoprotein component of the extracellular virus envelope. *J Virol* 66: 7217–7224. PMID: [1433514](#)
72. Law M, Carter GC, Roberts KL, Hollinshead M, Smith GL (2006) Ligand-induced and nonfusogenic dissolution of a viral membrane. *Proc Natl Acad Sci U S A* 103: 5989–5994. PMID: [16585508](#)
73. Fogg C, Lustig S, Whitbeck JC, Eisenberg RJ, Cohen GH, et al. (2004) Protective immunity to vaccinia virus induced by vaccination with multiple recombinant outer membrane proteins of intracellular and extracellular virions. *J Virol* 78: 10230–10237. PMID: [15367588](#)
74. Galmiche MC, Goenaga J, Wittek R, Rindisbacher L (1999) Neutralizing and protective antibodies directed against vaccinia virus envelope antigens. *Virology* 254: 71–80. PMID: [9927575](#)
75. Heraud JM, Edghill-Smith Y, Ayala V, Kalisz I, Parrino J, et al. (2006) Subunit recombinant vaccine protects against monkeypox. *J Immunol* 177: 2552–2564. PMID: [16888017](#)
76. Hooper JW, Custer DM, Schmaljohn CS, Schmaljohn AL (2000) DNA vaccination with vaccinia virus L1R and A33R genes protects mice against a lethal poxvirus challenge. *Virology* 266: 329–339. PMID: [10639319](#)
77. Kaufman DR, Goudsmit J, Holterman L, Ewald BA, Denholtz M, et al. (2008) Differential antigen requirements for protection against systemic and intranasal vaccinia virus challenges in mice. *J Virol* 82: 6829–6837. doi: [10.1128/JVI.00353-08](#) PMID: [18448519](#)
78. Thornburg NJ, Ray CA, Collier ML, Liao HX, Pickup DJ, et al. (2007) Vaccination with Venezuelan equine encephalitis replicons encoding cowpox virus structural proteins protects mice from intranasal cowpox virus challenge. *Virology* 362: 441–452. PMID: [17292434](#)
79. Hooper JW, Ferro AM, Golden JW, Silvera P, Dudek J, et al. (2009) Molecular smallpox vaccine delivered by alphavirus replicons elicits protective immunity in mice and non-human primates. *Vaccine* 28: 494–511. doi: [10.1016/j.vaccine.2009.09.133](#) PMID: [19833247](#)
80. Bendtsen JD, Nielsen H, von Heijne G, Brunak S (2004) Improved prediction of signal peptides: SignalP 3.0. *J Mol Biol* 340: 783–795. PMID: [15223320](#)
81. Bendtsen JD, Jensen LJ, Blom N, Von Heijne G, Brunak S (2004) Feature-based prediction of non-classical and leaderless protein secretion. *Protein Eng Des Sel* 17: 349–356. PMID: [15115854](#)
82. Monge A, Elvira L, Gonzalez JV, Astiz S, Wellenberg GJ (2006) Bovine herpesvirus 4-associated postpartum metritis in a Spanish dairy herd. *Res Vet Sci* 80: 120–125. PMID: [15946713](#)

83. Frazier KS, Baldwin CA, Pence M, West J, Bernard J, et al. (2002) Seroprevalence and comparison of isolates of endometriotropic bovine herpesvirus-4. *J Vet Diagn Invest* 14: 457–462. PMID: [12423026](#)
84. Donofrio G, Ravanetti L, Cavarani S, Herath S, Capocefalo A, et al. (2008) Bacterial infection of endometrial stromal cells influences bovine herpesvirus 4 immediate early gene activation: a new insight into bacterial and viral interaction for uterine disease. *Reproduction* 136: 361–366. doi: [10.1530/REP-08-0171](#) PMID: [18577555](#)
85. Donofrio G, Capocefalo A, Franceschi V, Price S, Cavarani S, et al. (2010) The chemokine IL8 is up-regulated in bovine endometrial stromal cells by the BoHV-4 IE2 gene product, ORF50/Rta: a step ahead toward a mechanism for BoHV-4 induced endometritis. *Biol Reprod* 83: 919–928. doi: [10.1095/biolreprod.110.086074](#) PMID: [20720165](#)
86. Jacca S, Franceschi V, Colagiorgi A, Sheldon M, Donofrio G (2013) Bovine endometrial stromal cells support tumor necrosis factor alpha-induced bovine herpesvirus type 4 enhanced replication. *Biol Reprod* 88: 135. doi: [10.1095/biolreprod.112.106740](#) PMID: [23515672](#)
87. Frey SE, Newman FK, Kennedy JS, Sobek V, Ennis FA, et al. (2007) Clinical and immunologic responses to multiple doses of IMVAMUNE (Modified Vaccinia Ankara) followed by Dryvax challenge. *Vaccine* 25: 8562–8573. PMID: [18036708](#)
88. Parrino J, McCurdy LH, Larkin BD, Gordon IJ, Rucker SE, et al. (2007) Safety, immunogenicity and efficacy of modified vaccinia Ankara (MVA) against Dryvax challenge in vaccinia-naive and vaccinia-immune individuals. *Vaccine* 25: 1513–1525. PMID: [17126963](#)
89. Americo JL, Sood CL, Cotter CA, Vogel JL, Kristie TM, et al. (2014) Susceptibility of the wild-derived inbred CAST/Ei mouse to infection by orthopoxviruses analyzed by live bioluminescence imaging. *Virology* 449: 120–132. doi: [10.1016/j.virol.2013.11.017](#) PMID: [24418545](#)
